# Supplementary material
Source: MDPI journal article supplement (https://www.mdpi.com/2673-8015/3/1/11)
Supplement: s1 [file s1]

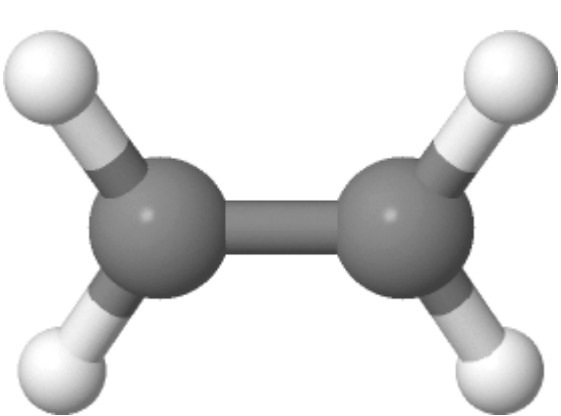

Ethylene (19)

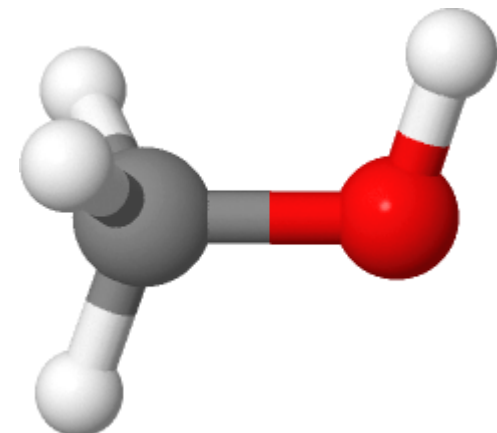

Methanol (12)

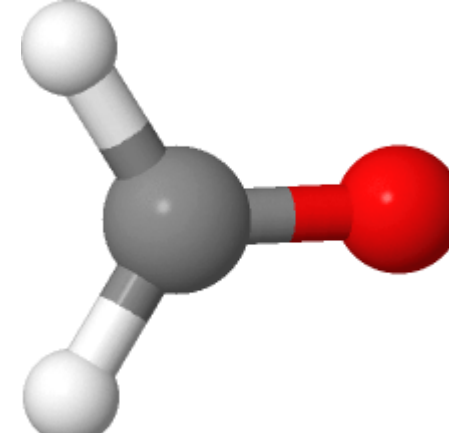

Formaldehyde (8)

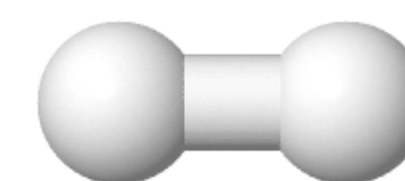

Hydrogen (9)

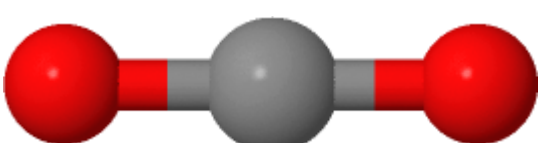

CO<sub>2</sub> (6)

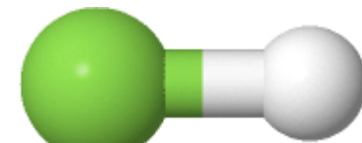

HF (7)

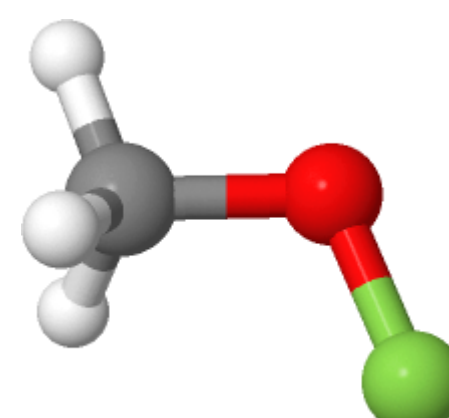

Methyl Hypofluoride (8)

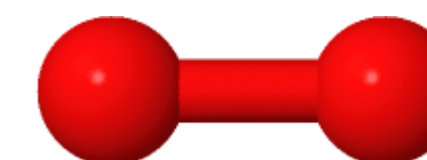

Oxygen (4)

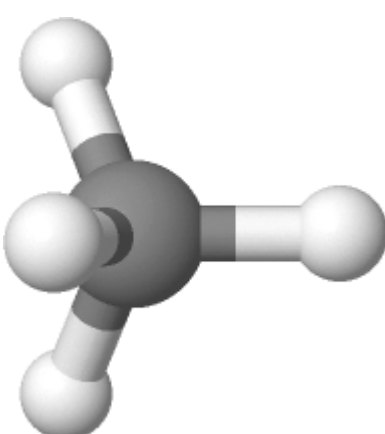

Methane (4)

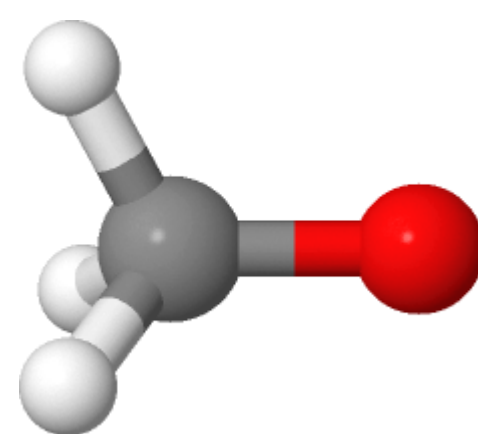

Methanolate (2)

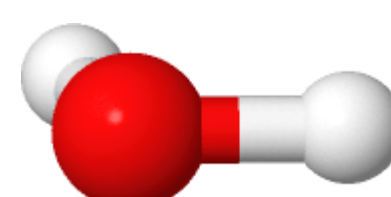

Water (2)

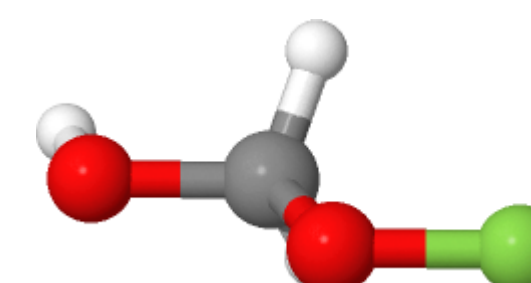

"OCOF" (2)

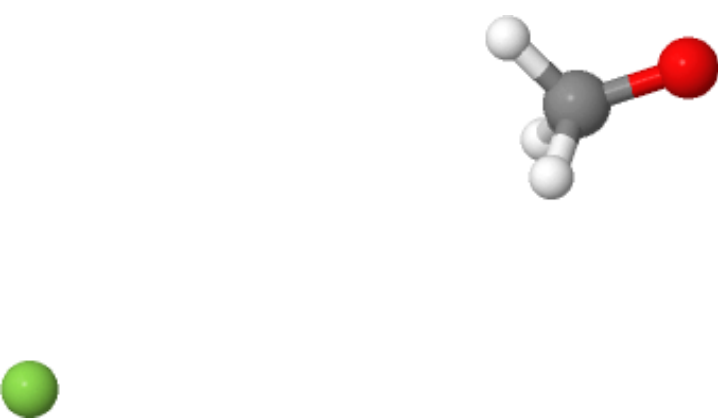

Methyl Hypofluoride (0)

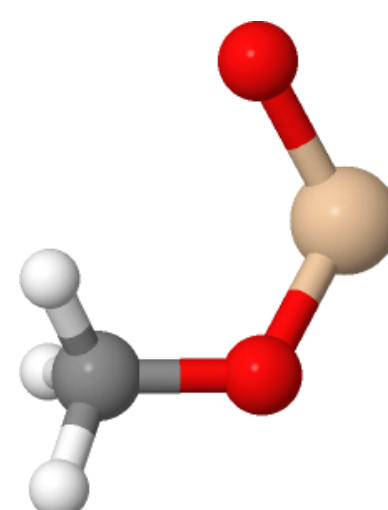

"CO[Si][O]" (1)

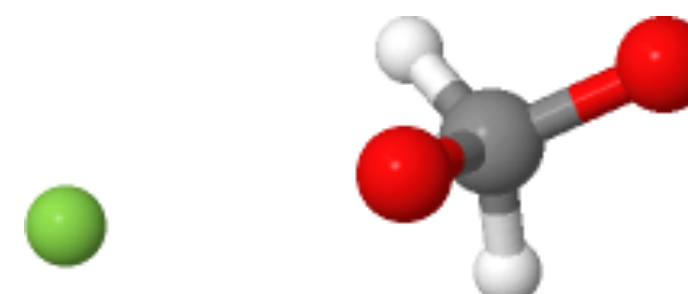

"[O]C[O].[F]" (1)

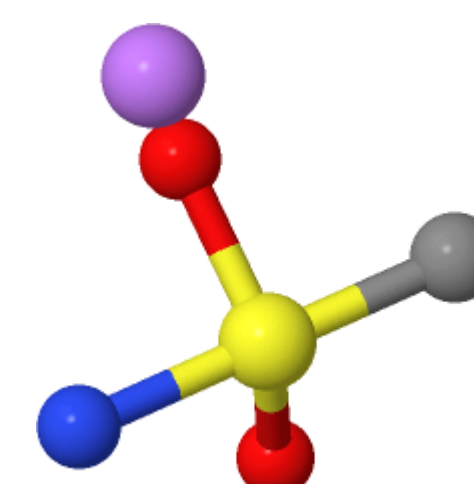

"[Li]O[S@]([O])([N])[C]" (2)

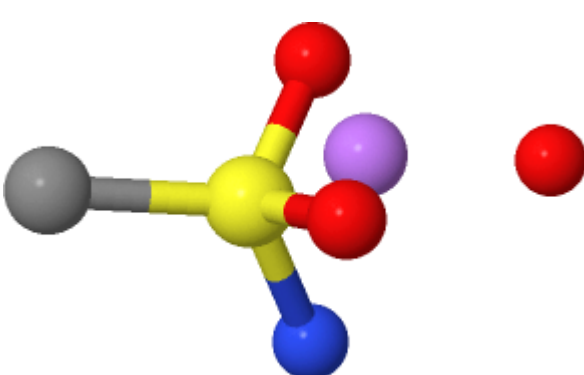

"[C]S(=O)(=O)[N].[Li][O]" (0)

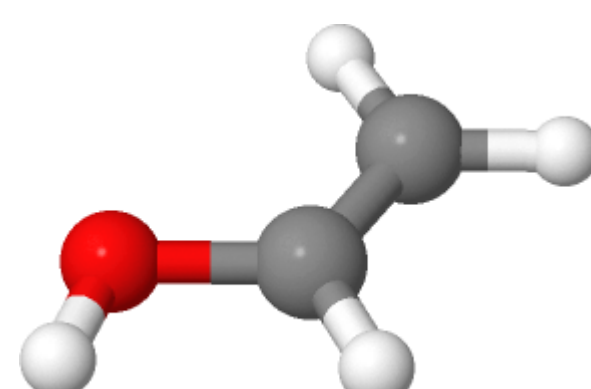

Vinyl Alcohol (1)

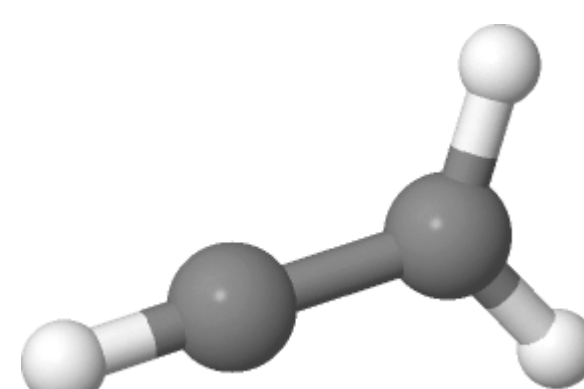

"[CH][CH2]" (1)

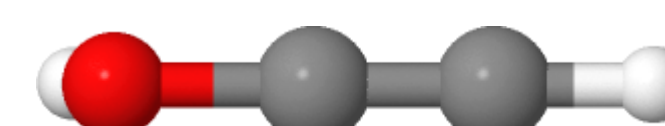

Ethynol (1)

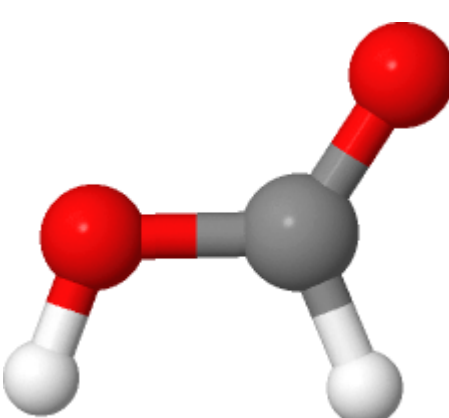

Formic Acid (1)

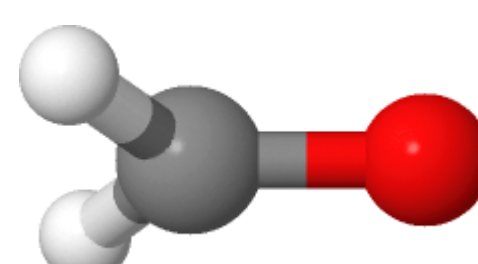

Formaldehyde (0)

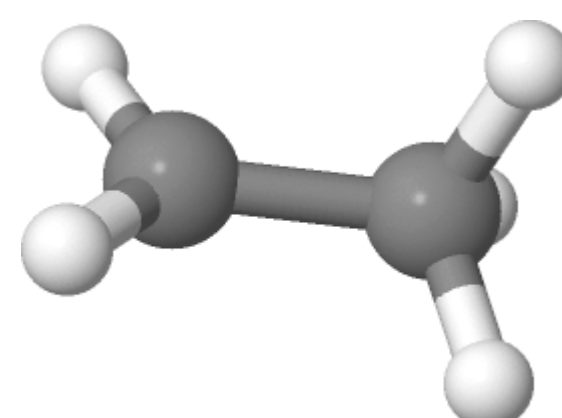

"[CH2]C" (1)

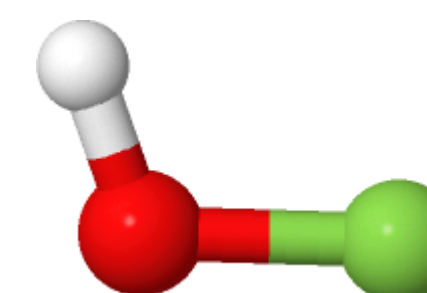

Hyperfluorous Acid (1)
