# Supplementary material
Source: MDPI journal article supplement (https://www.mdpi.com/2673-8015/3/1/11)
Supplement: s1 [file s1]

Number density / Angstrom

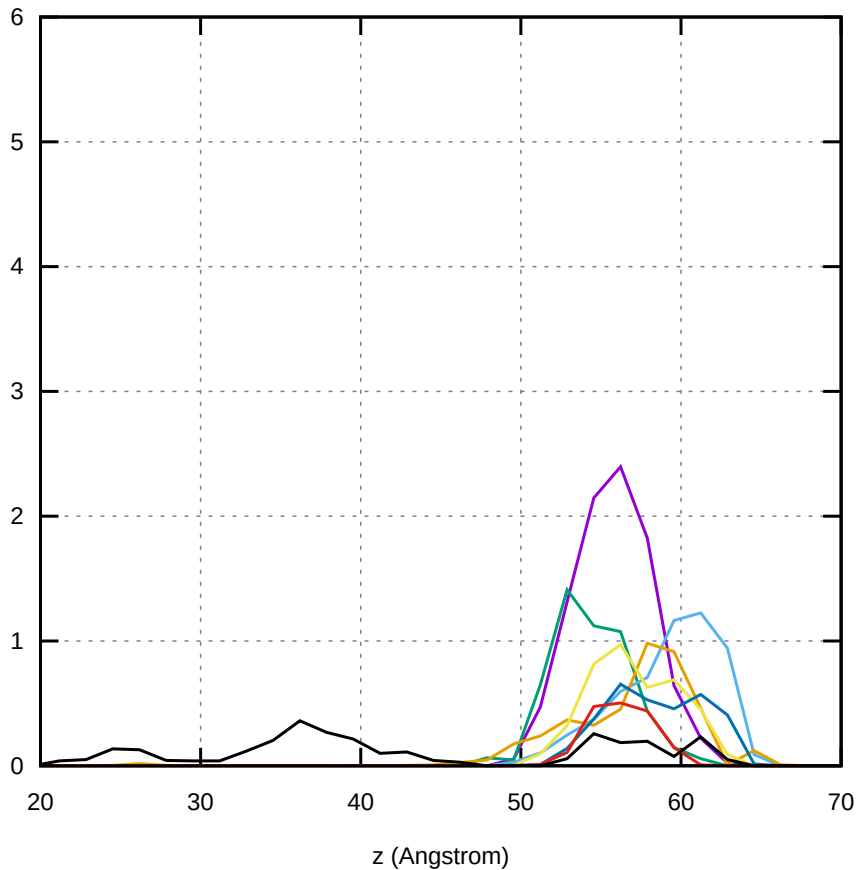

Ethylene  
Methanol  
Formaldehyde  
Hydrogen  
Carbon Dioxide  
Hydrogen Fluoride  
Methyl Hypofluoride  
Oxygen
