# Supplementary material
Source: MDPI journal article supplement (https://www.mdpi.com/2673-8015/3/1/11)
Supplement: s1 [file s1]

Number density / Angstrom

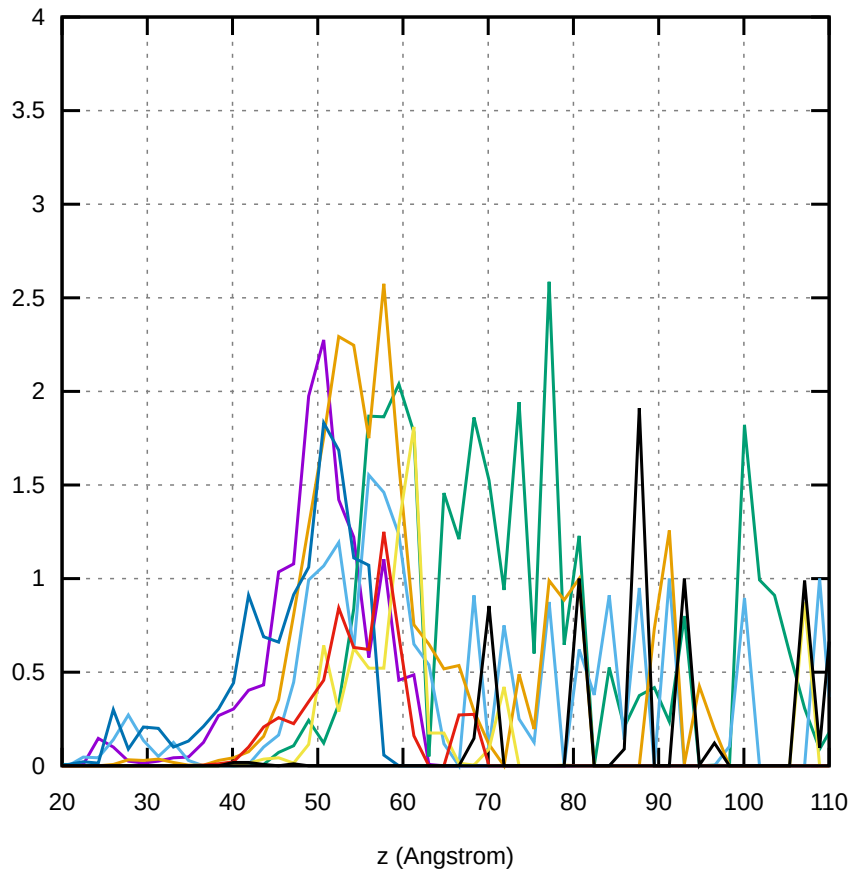

Carbon Dioxide

Formaldehyde

Ethylene

Hydrogen Fluoride

Methyl Hypofluoride

Hydroxyl Radical

Hyperfluorous Acid

Methanolate
