# Supplementary material
Source: MDPI journal article supplement (https://www.mdpi.com/2673-8015/3/1/11)
Supplement: s1 [file s1]

Number density / Angstrom

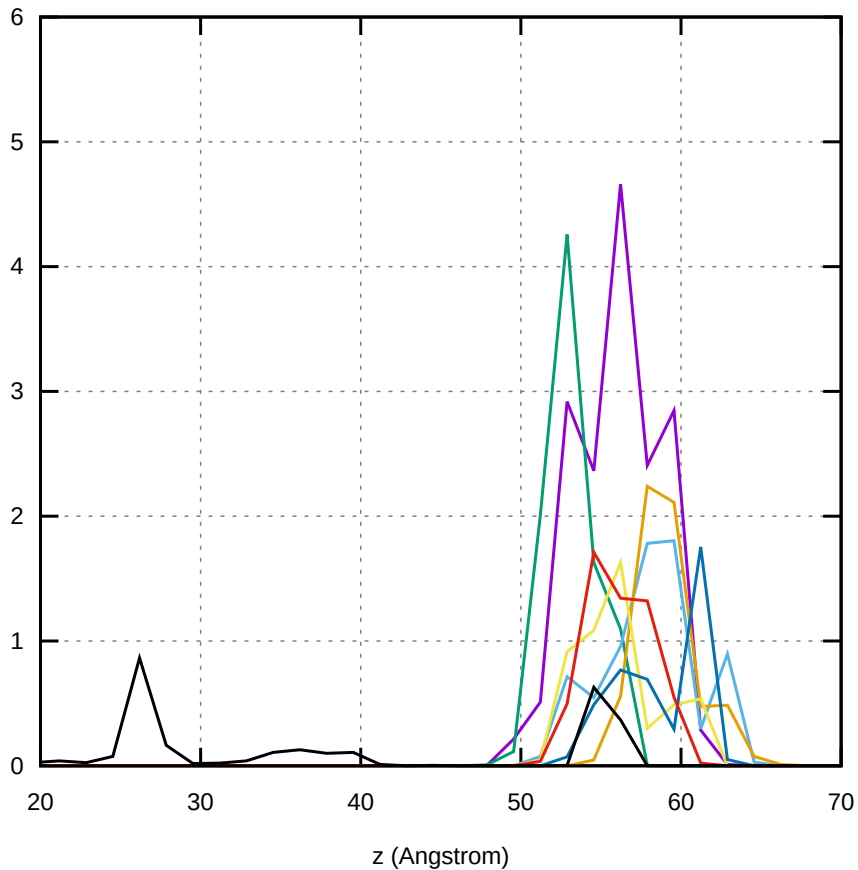

Ethylene

Methanol

Formaldehyde

Hydrogen

Carbon Dioxide

Hydrogen Fluoride

Methyl Hypofluoride

Oxygen
