# Supplementary material
Source: MDPI journal article supplement (https://www.mdpi.com/2673-8015/3/1/11)
Supplement: s1 [file s1]

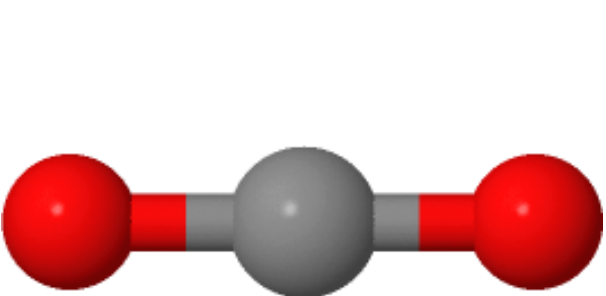

CO<sub>2</sub> (51)

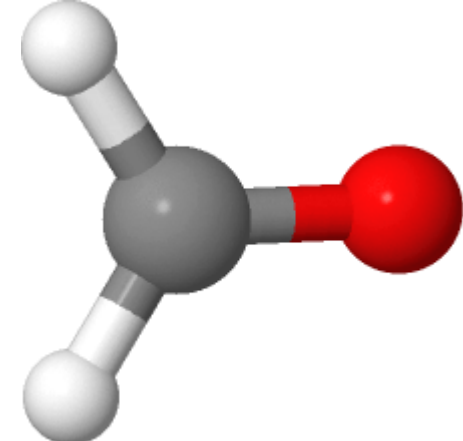

Formaldehyde (53)

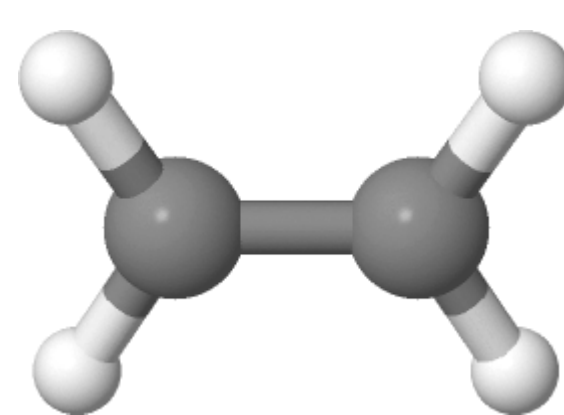

Ethylene (35)

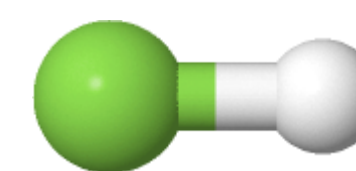

HF (41)

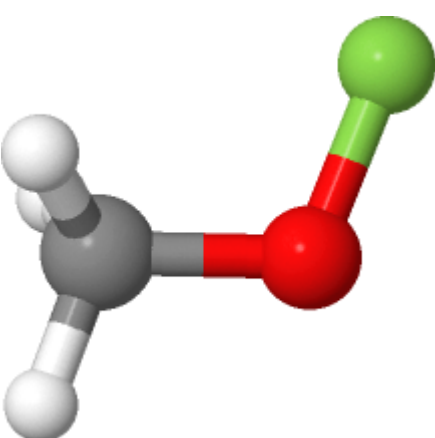

Methyl Hypofluoride (25)

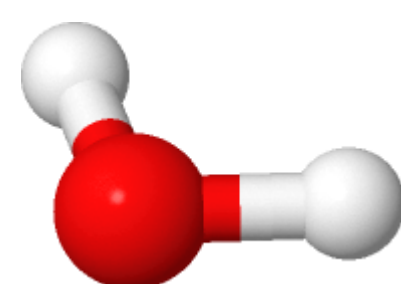

Hydroxyl Radical (19)

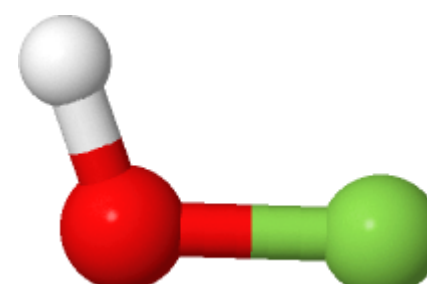

Hyperfluorous Acid (15)

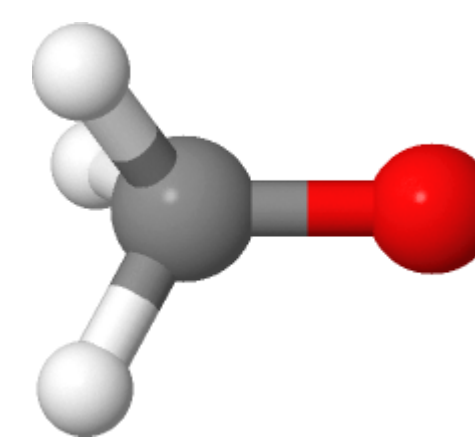

Methanolate (9)

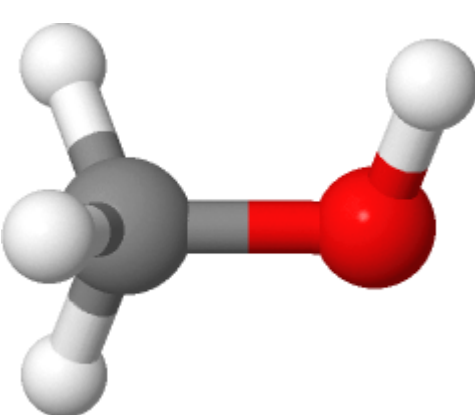

Methanol (12)

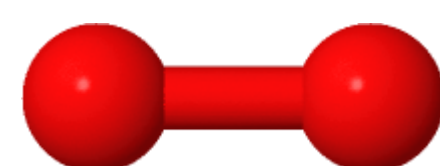

Oxygen (10)

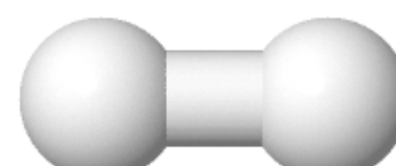

Hydrogen (9)

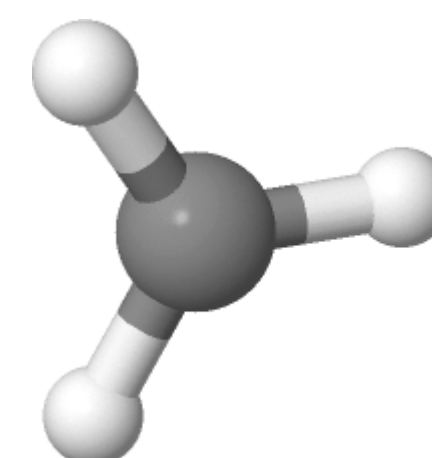

Methyl Radical (5)

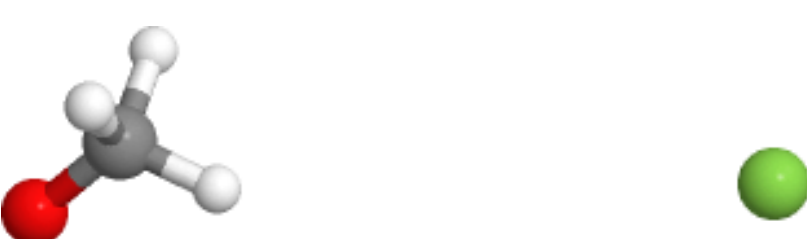

Methyl Hypofluoride (7)

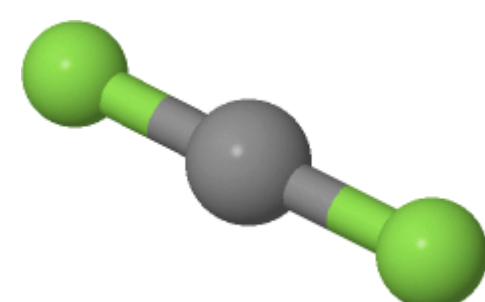

Difluorocarbene (7)

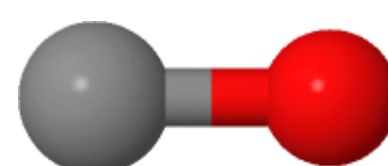

CO (5)

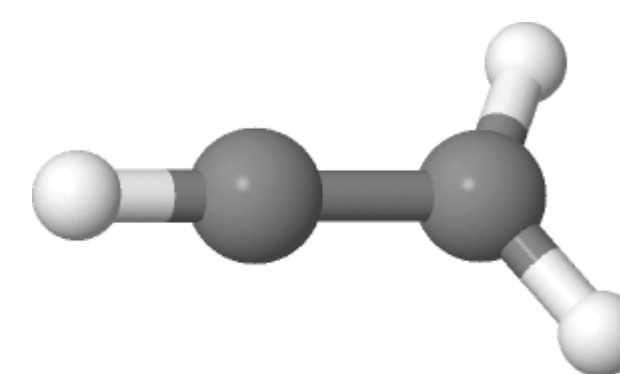

"[CH][CH<sub>2</sub>]" (3)

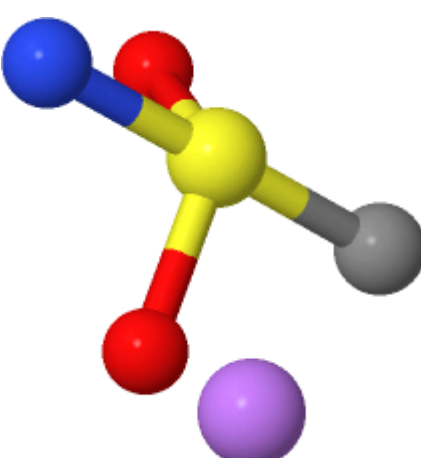

"[Li]O[S@@]([O])([N])[C]" (3)

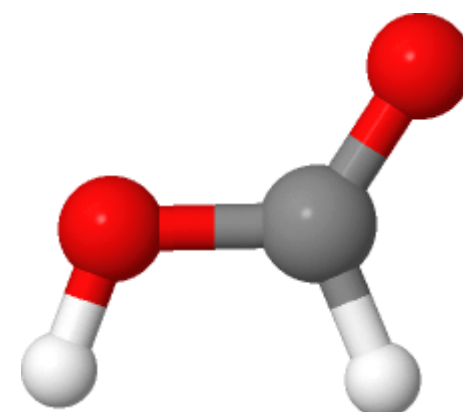

Formic Acid (5)

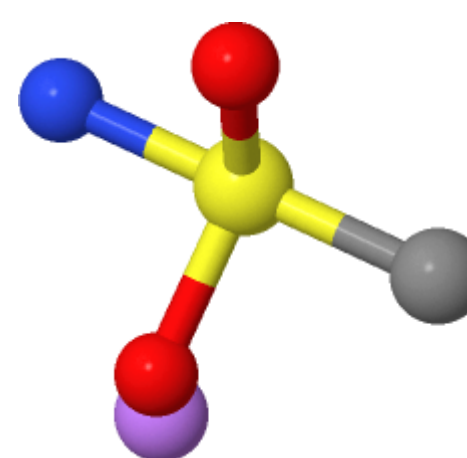

"[Li]O[S@]([O])([N])[C]" (3)

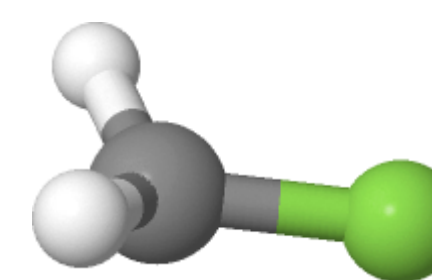

Fluoromethyl Radical (3)

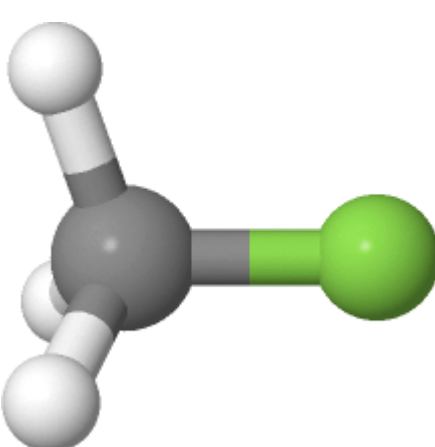

Fluoromethane (3)

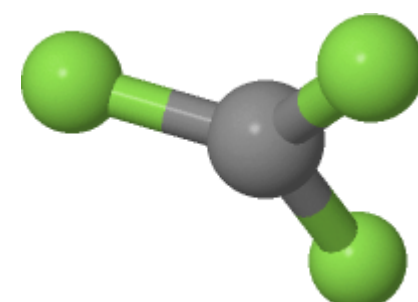

CF<sub>3</sub> (6)

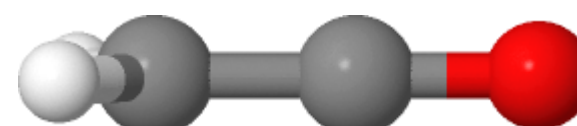

"C=C=O" (2)

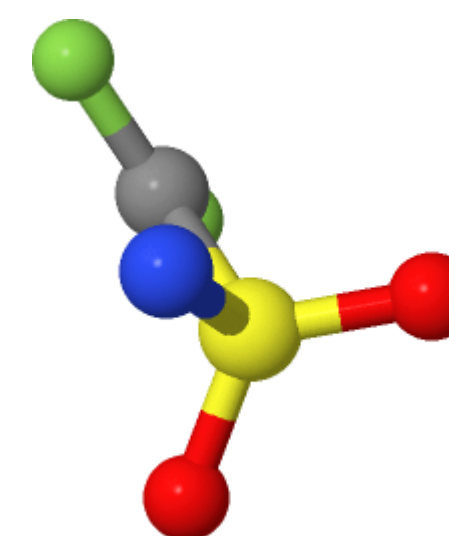

"F[C](S(=O)(=O)[N])F" (1)
