# Supplementary material
Source: MDPI journal article supplement (https://www.mdpi.com/2673-8015/3/1/11)

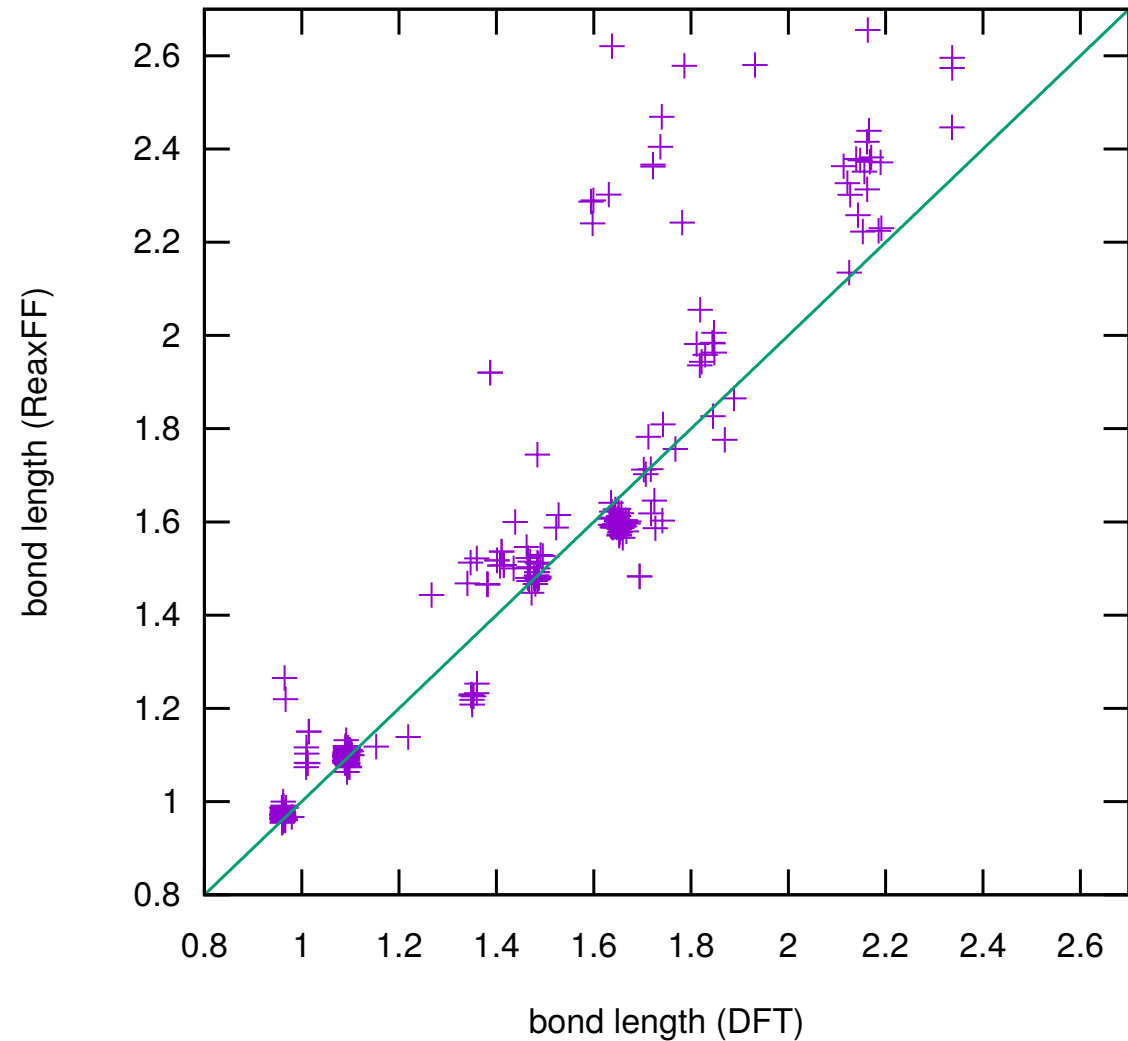

Supplement: s1 [file s1]

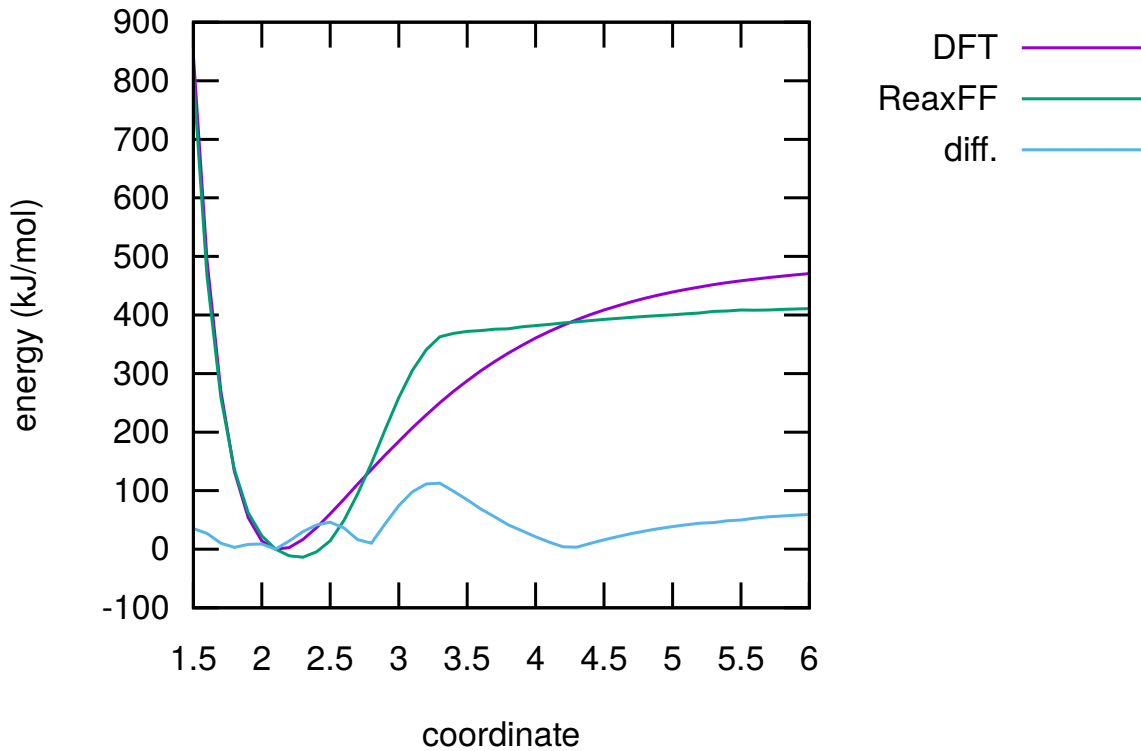

Supplement: s1 [file s1]

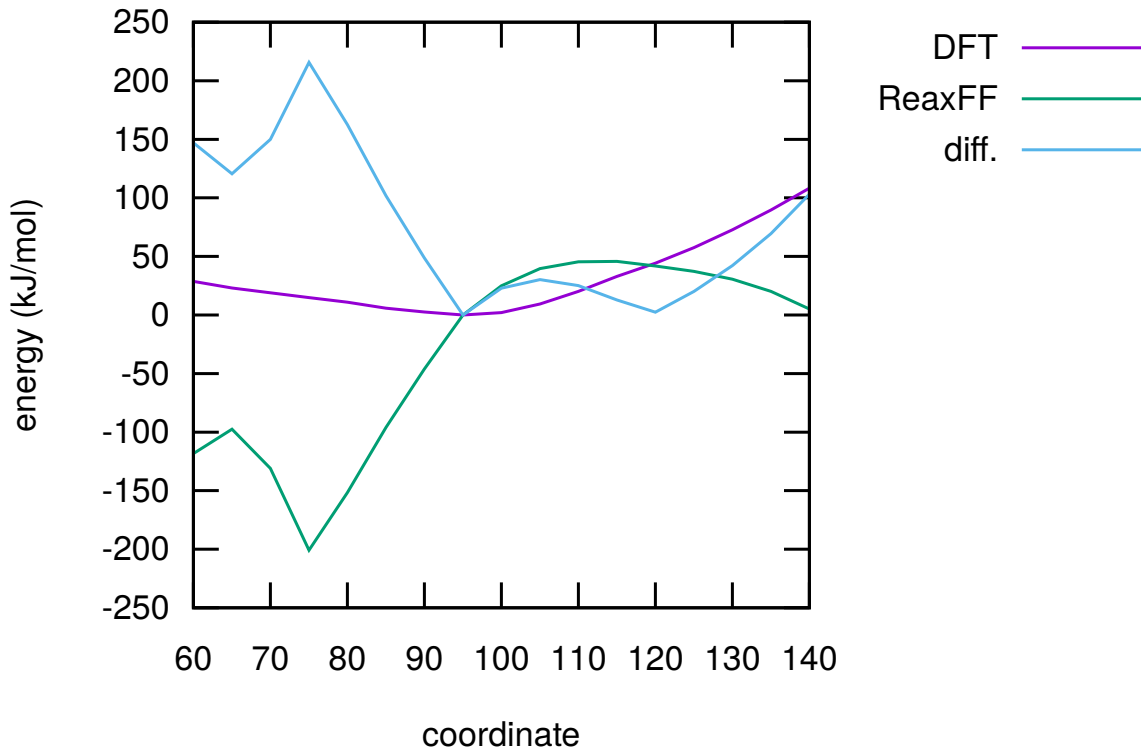

Supplement: s1 [file s1]

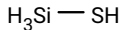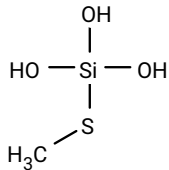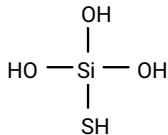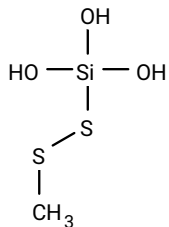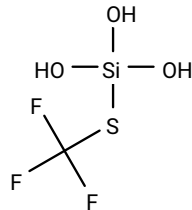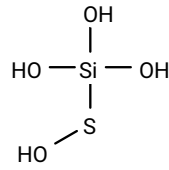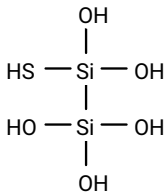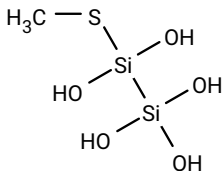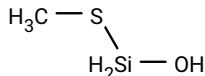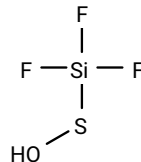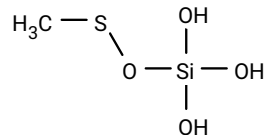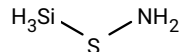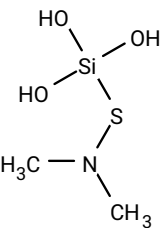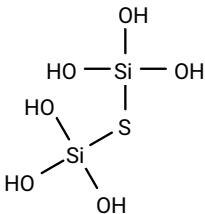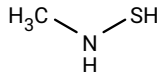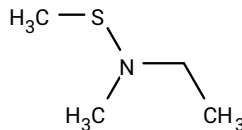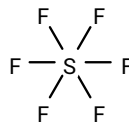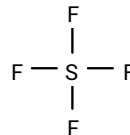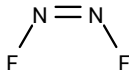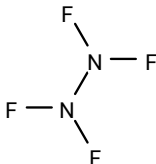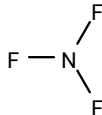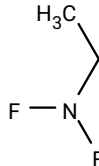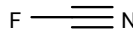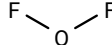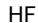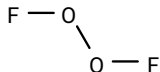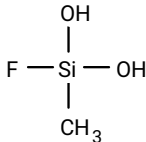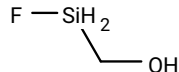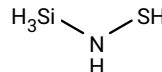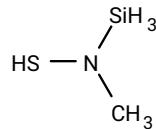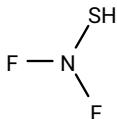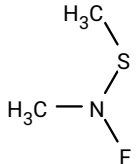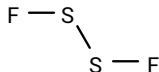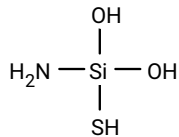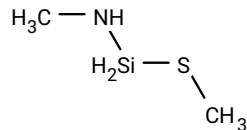

Supplement: s1 [file s1]

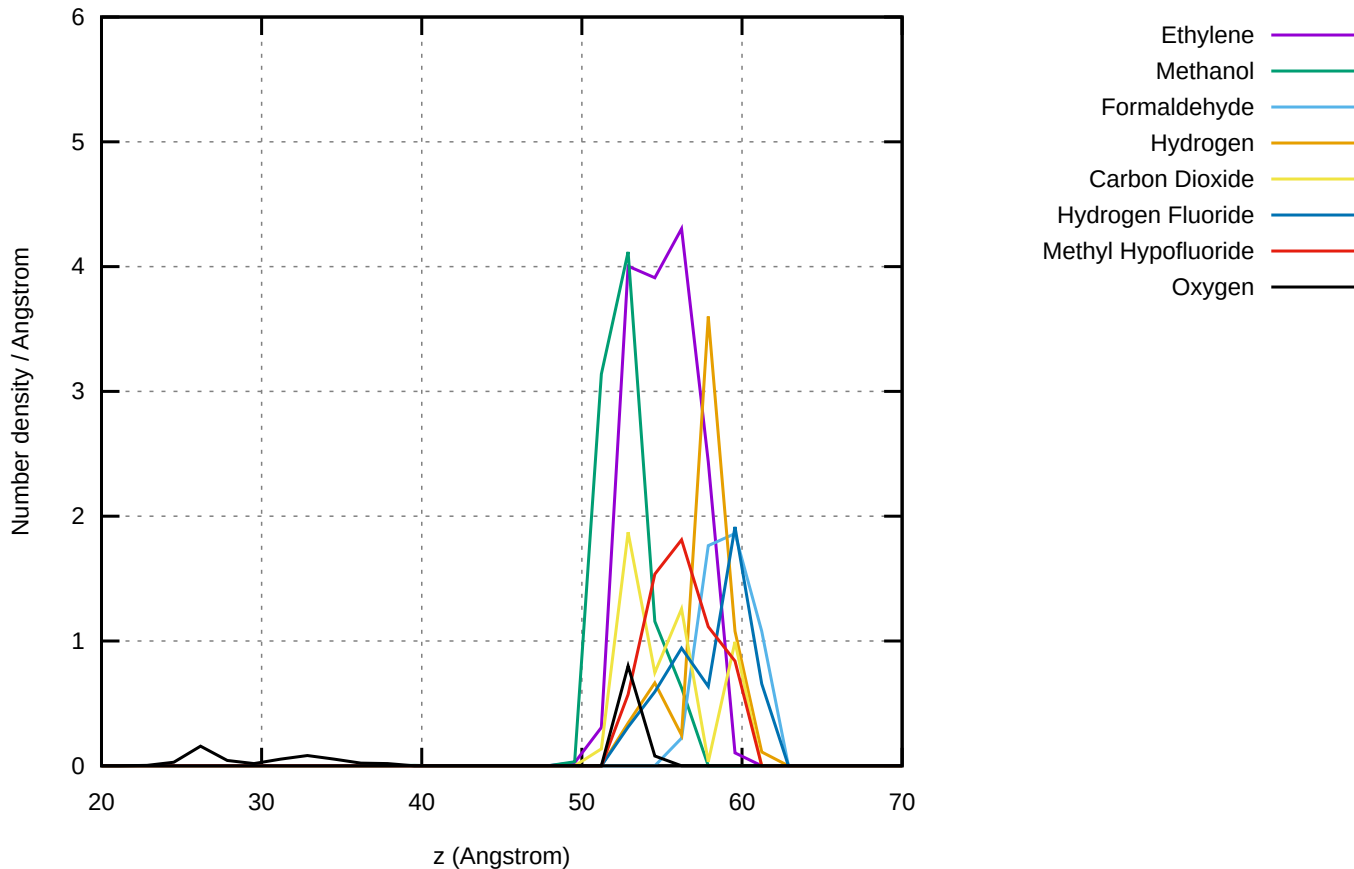

Supplement: s1 [file s1]

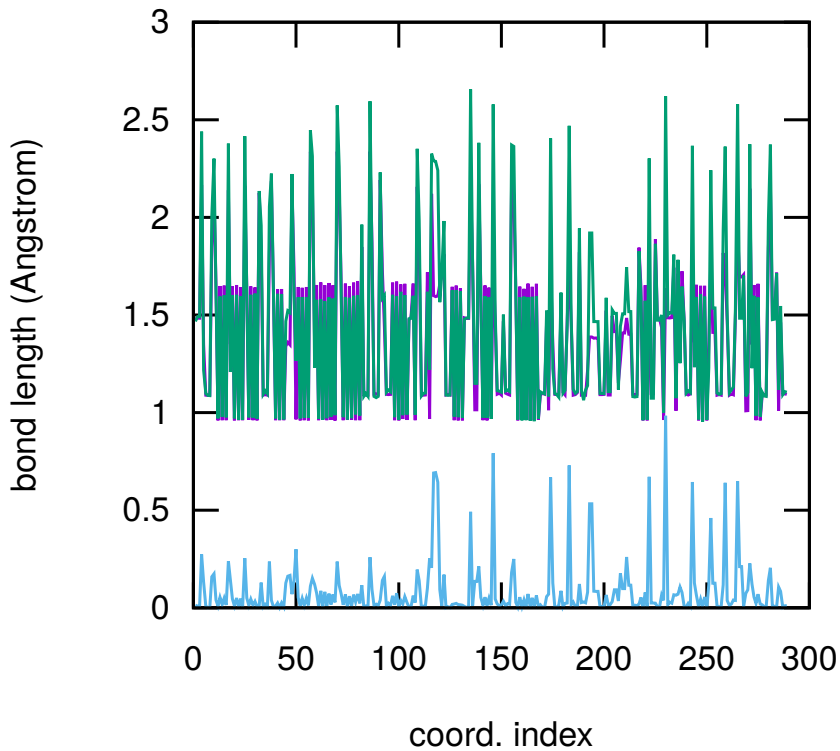

Supplement: s1 [file s1]

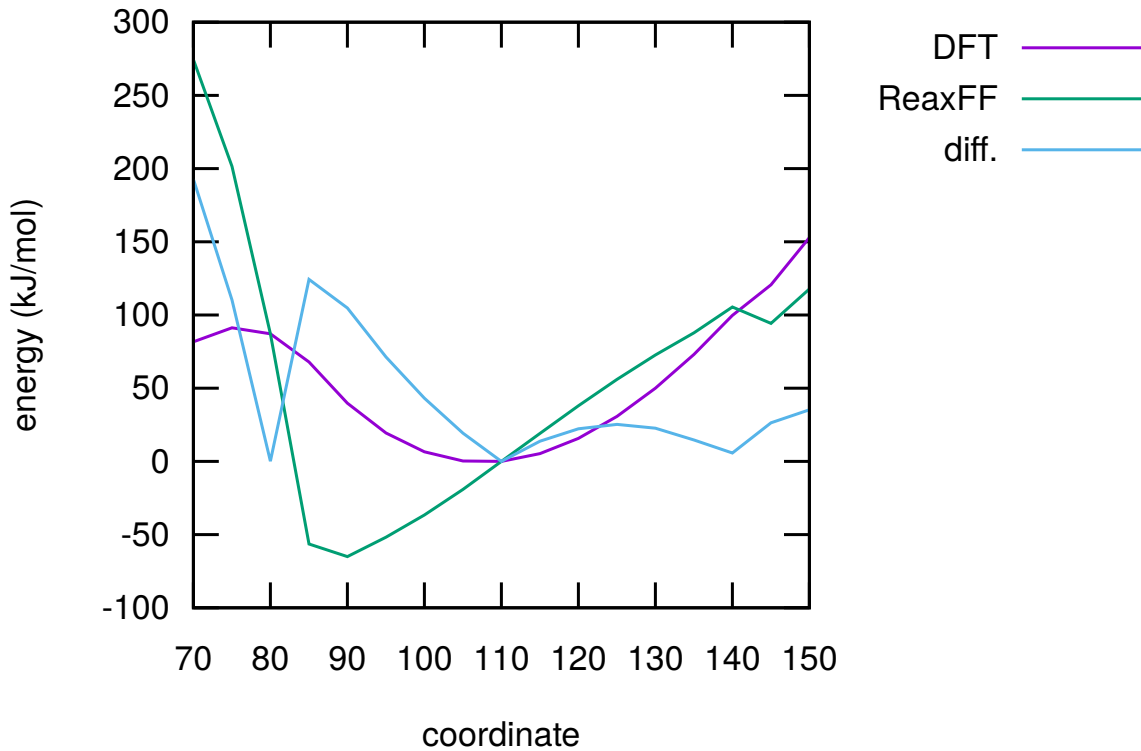

Supplement: s1 [file s1]

Number density / Angstrom<sup>2</sup>

O-Si —  
C-H —  
C-O —  
C-C —  
Si-Si —  
C-F —  
H-O —  
C-Si —  
O-F - -  
C-S - -  
S-Si - -

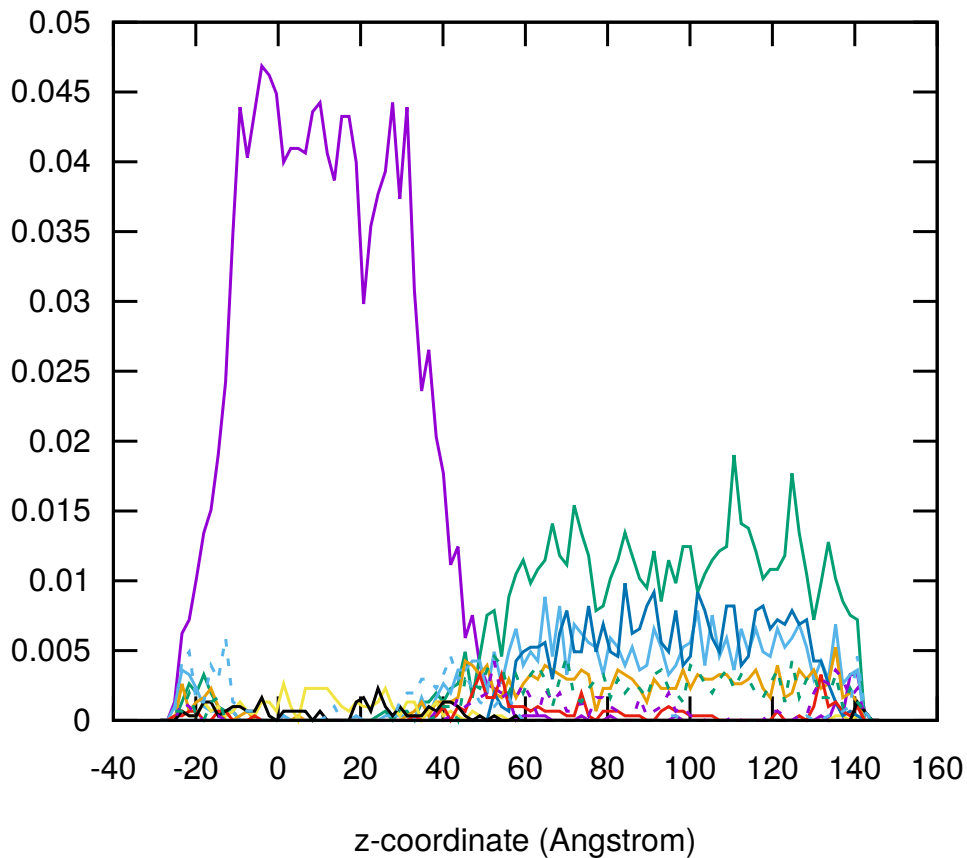

Supplement: s1 [file s1]

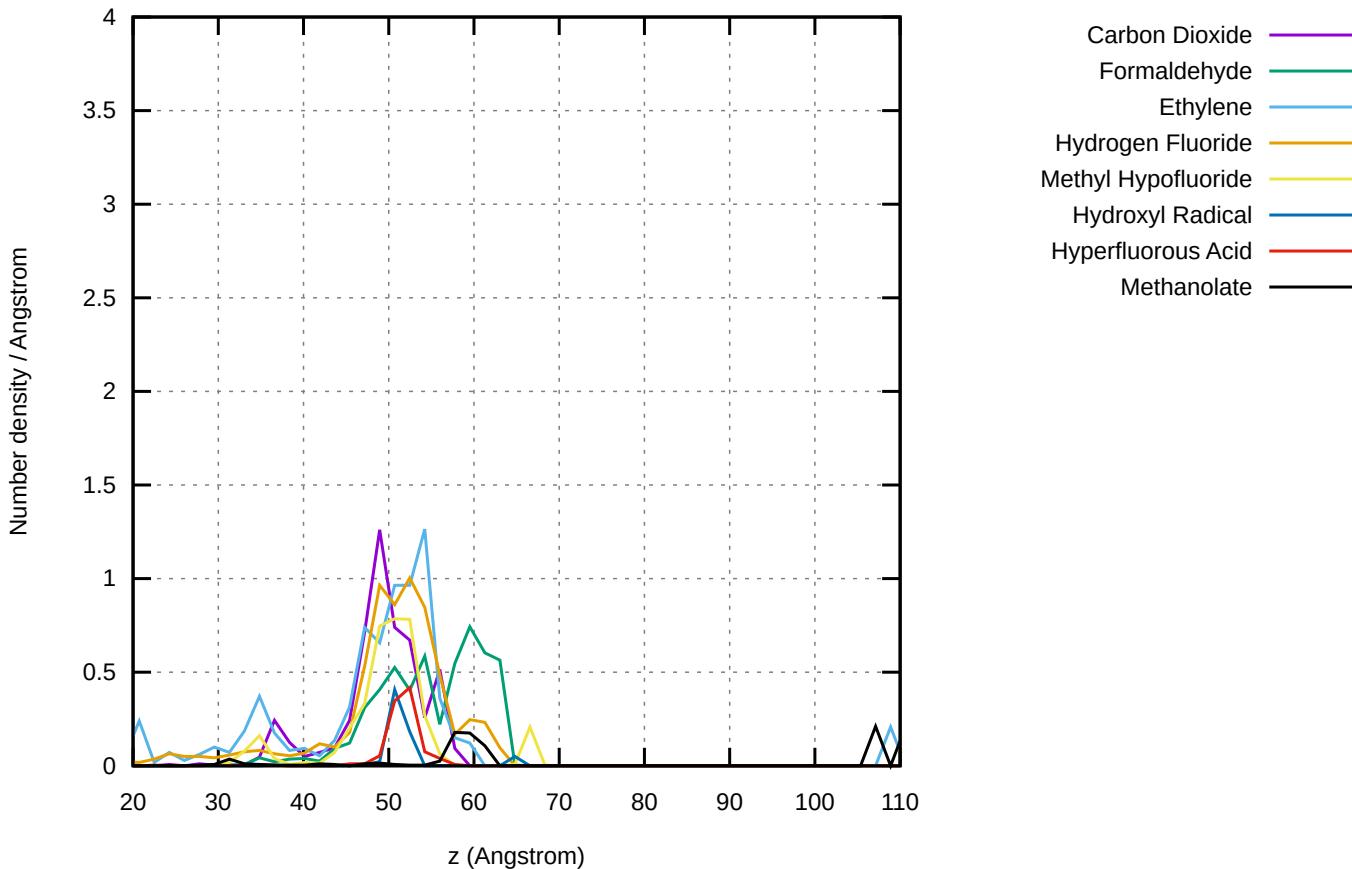

Supplement: s1 [file s1]

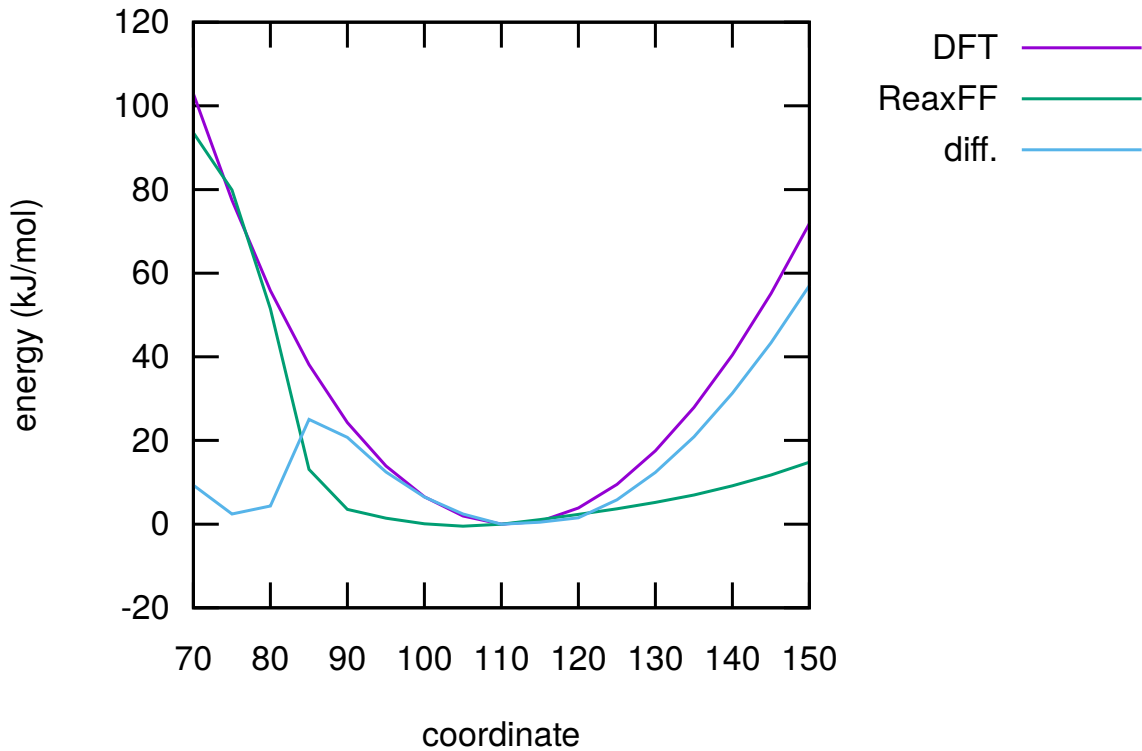

Supplement: s1 [file s1]

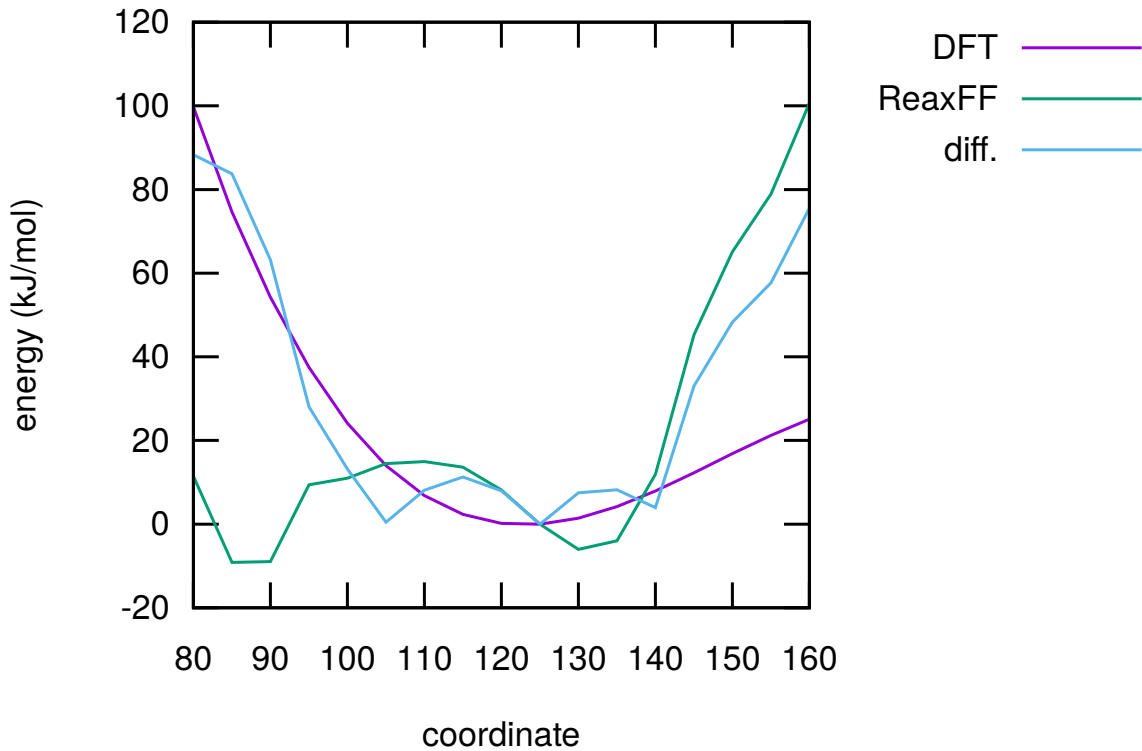

Supplement: s1 [file s1]

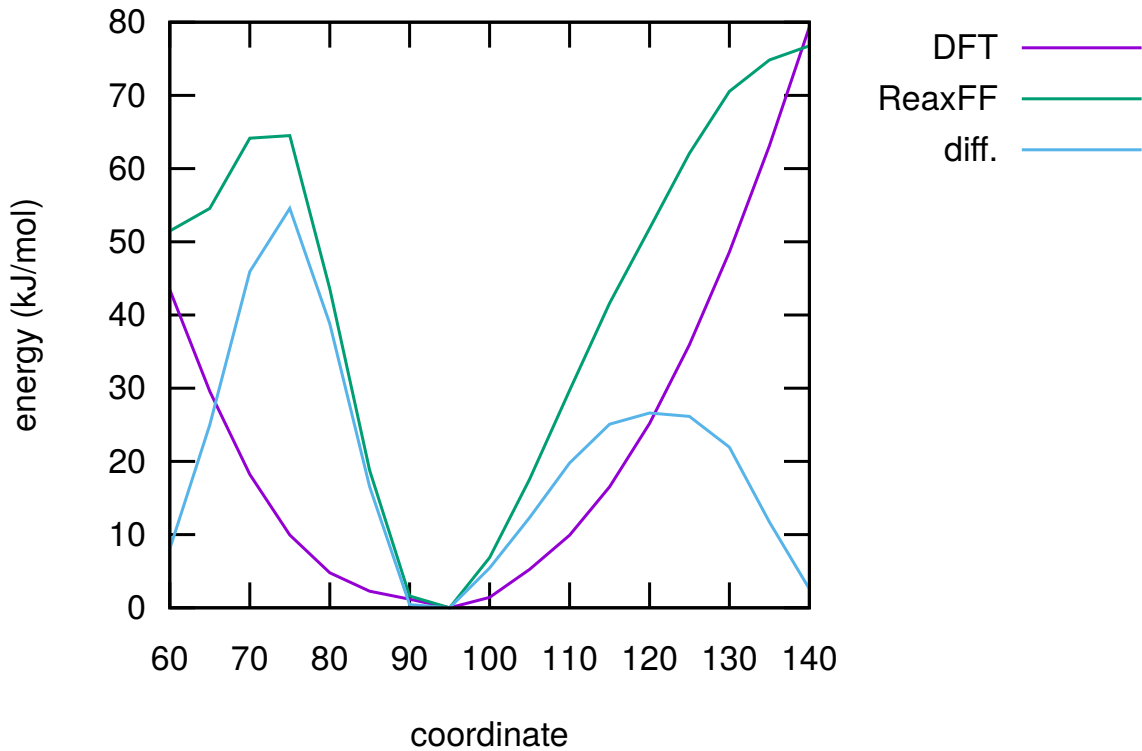

Supplement: s1 [file s1]

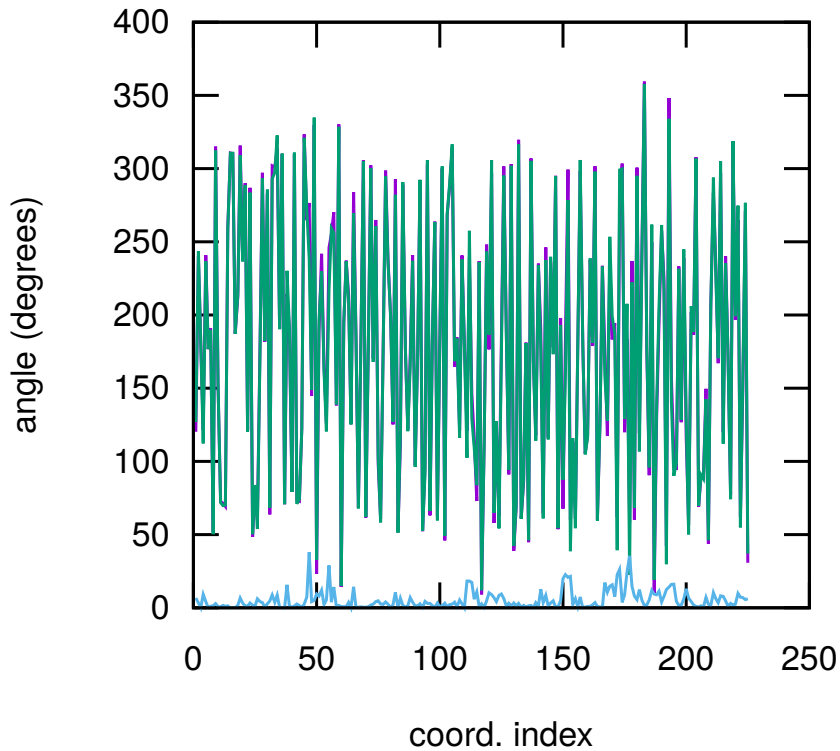

Supplement: s1 [file s1]

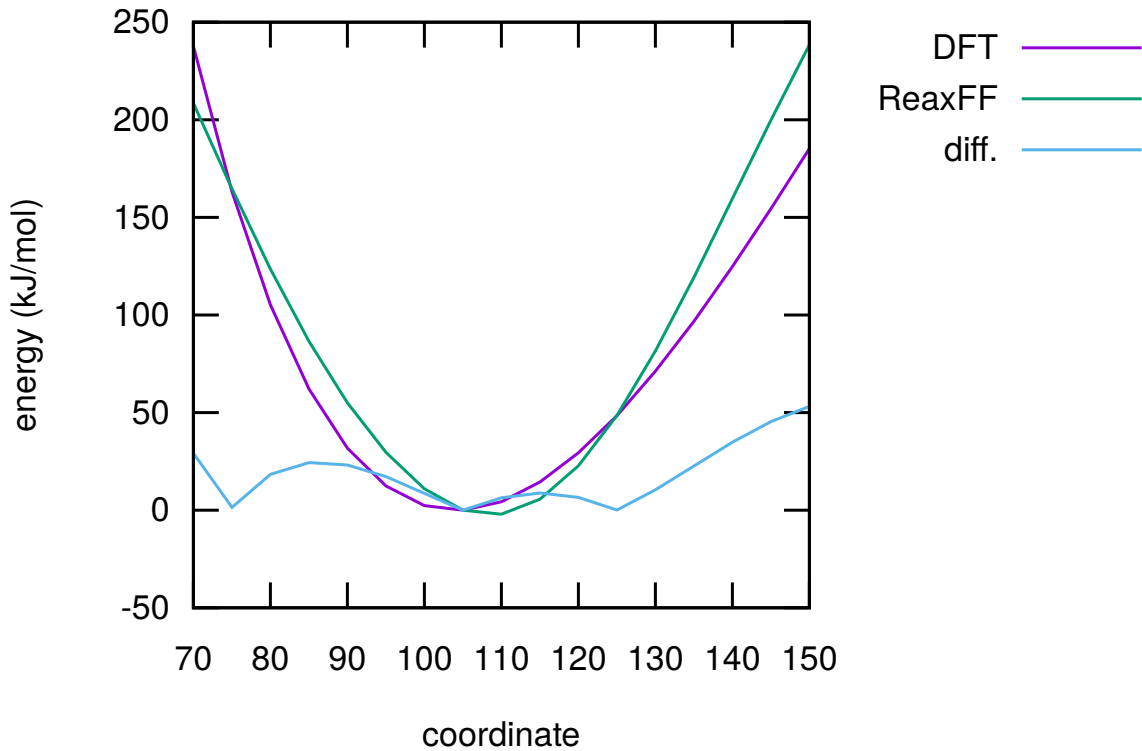

Supplement: s1 [file s1]

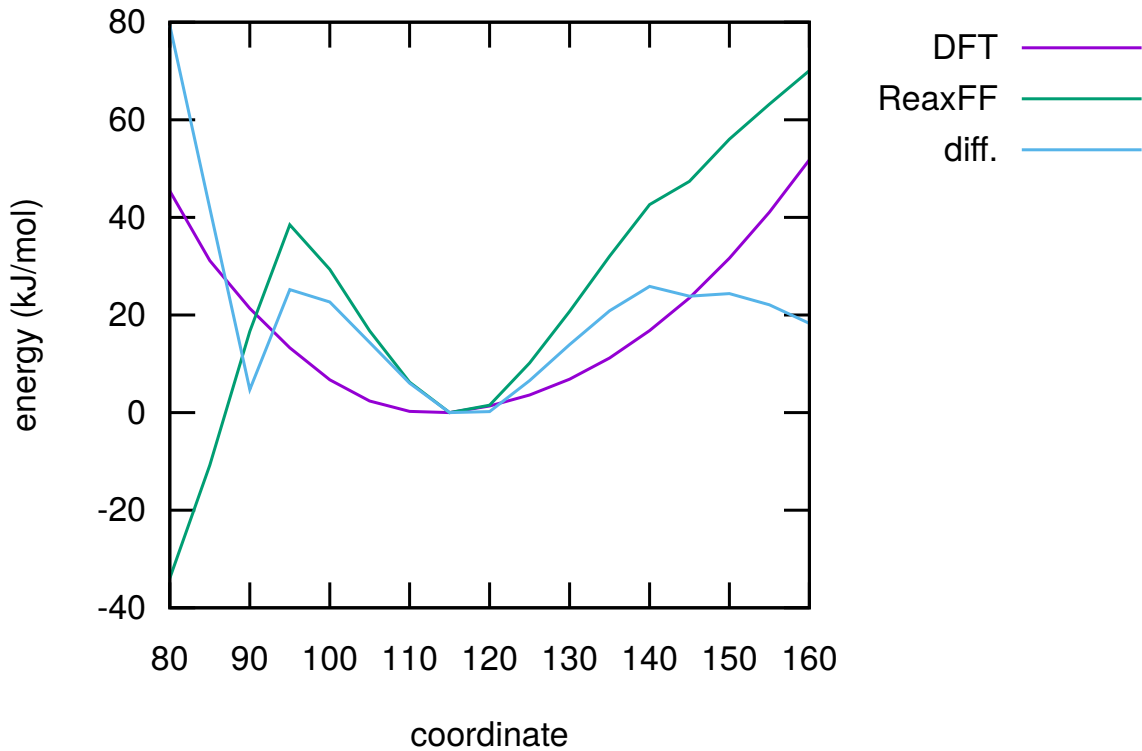

Supplement: s1 [file s1]

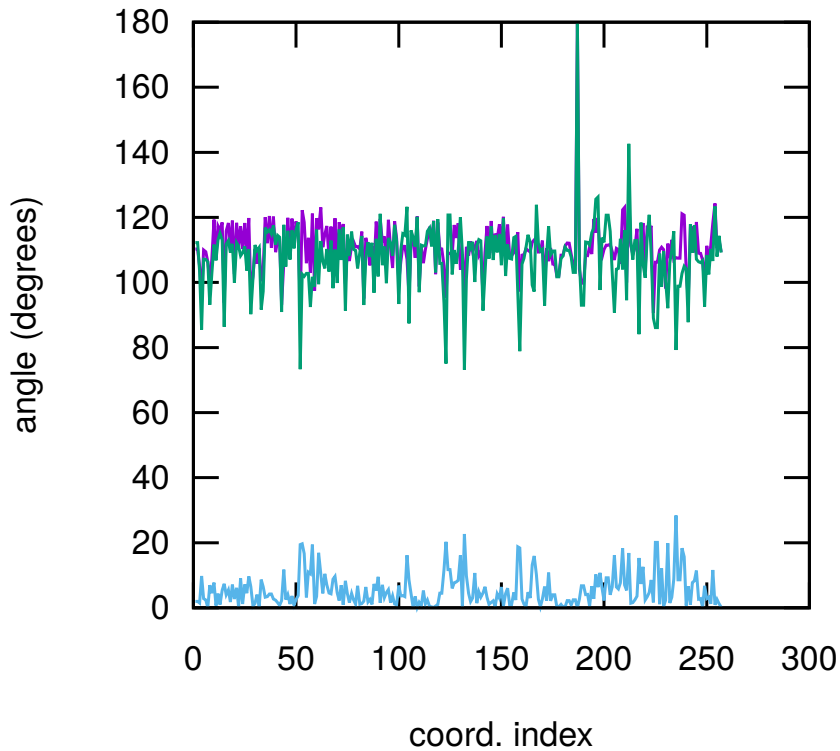

Supplement: s1 [file s1]

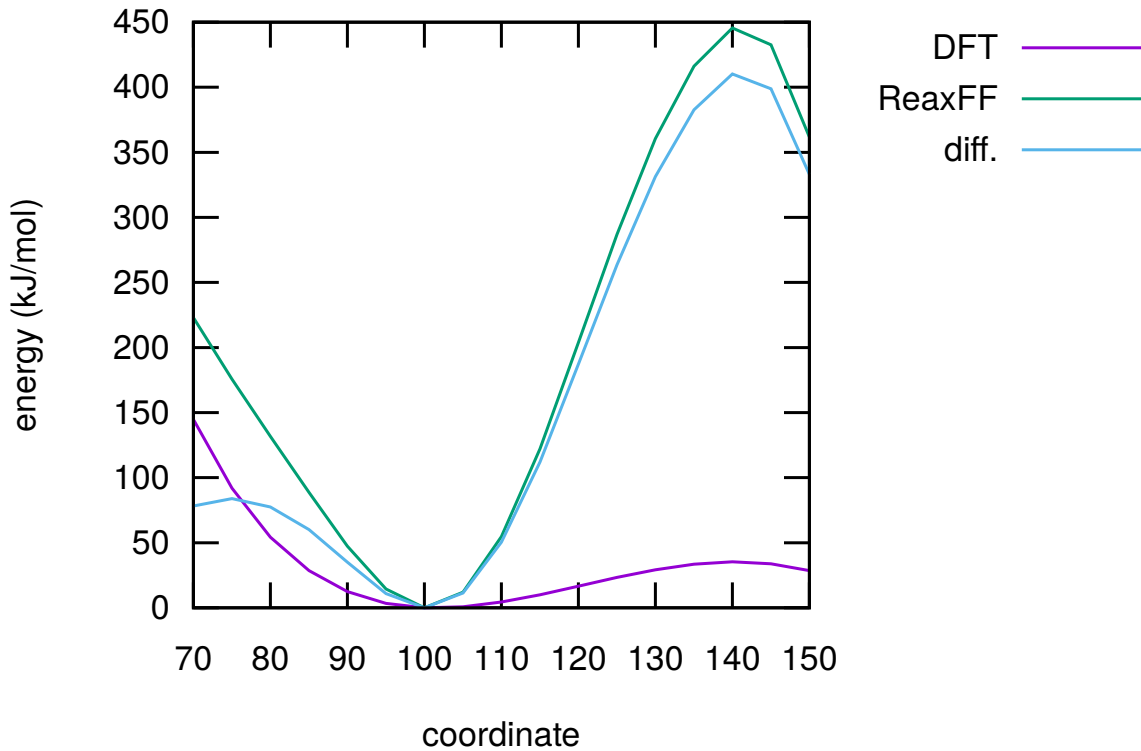

Supplement: s1 [file s1]

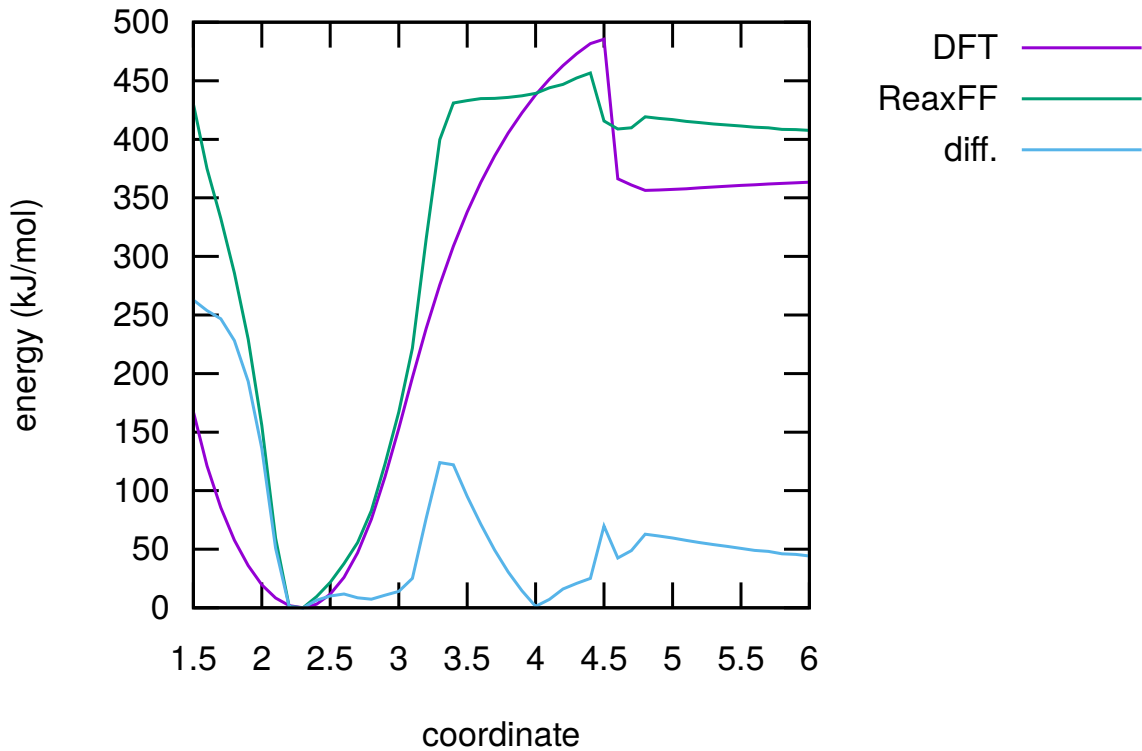

Supplement: s1 [file s1]

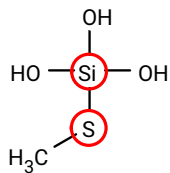

S1

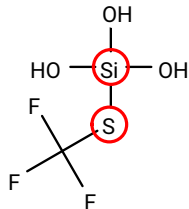

S2

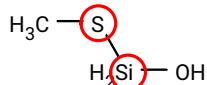

S3

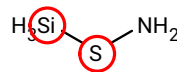

S4

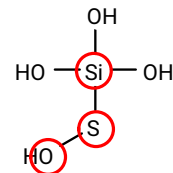

S5

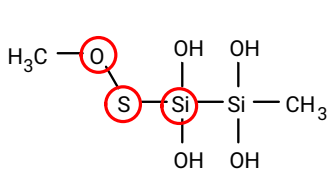

S6

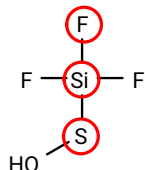

S7

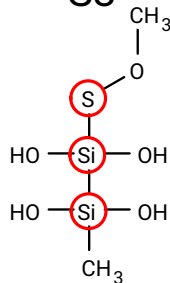

S8

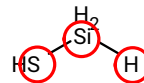

S9

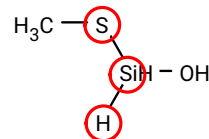

S10

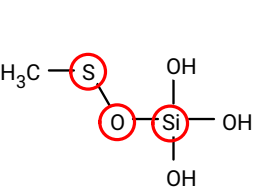

S11

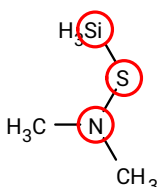

S12

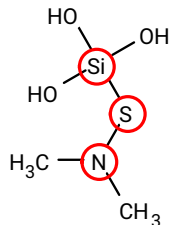

S13

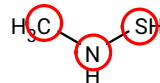

S14

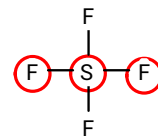

S15

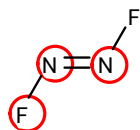

S16

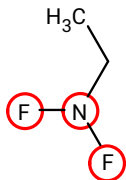

S17

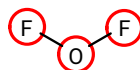

S18

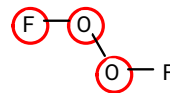

S19

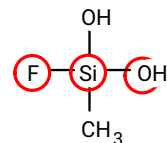

S20

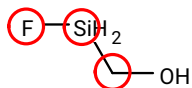

S21

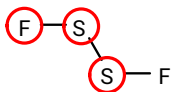

S22

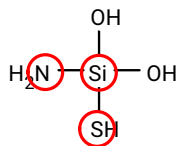

S23

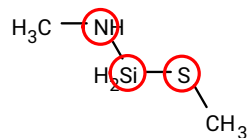

S24

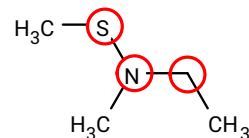

S25

Supplement: s1 [file s1]

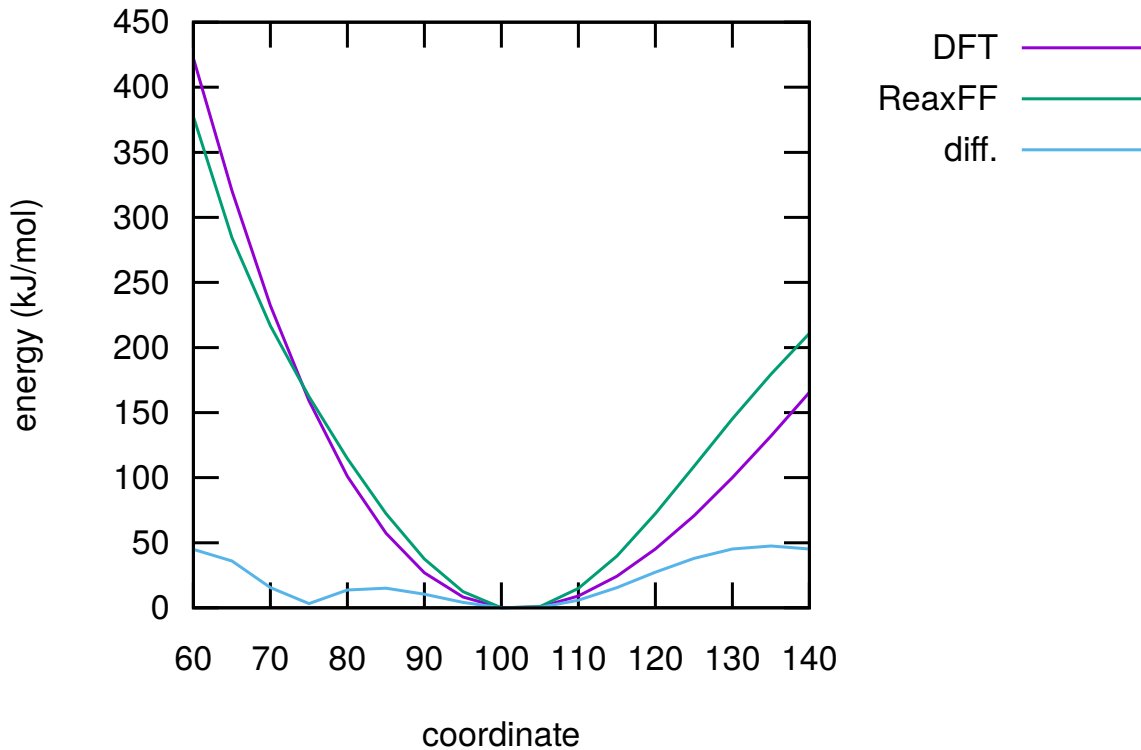

Supplement: s1 [file s1]

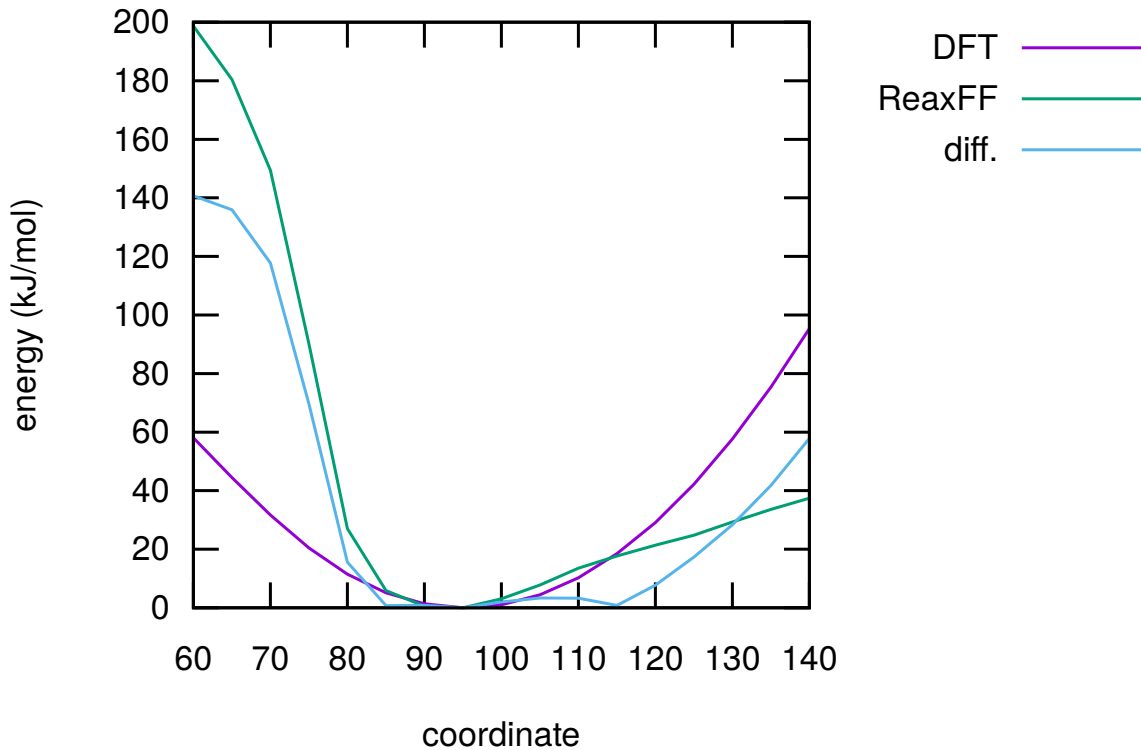

Supplement: s1 [file s1]

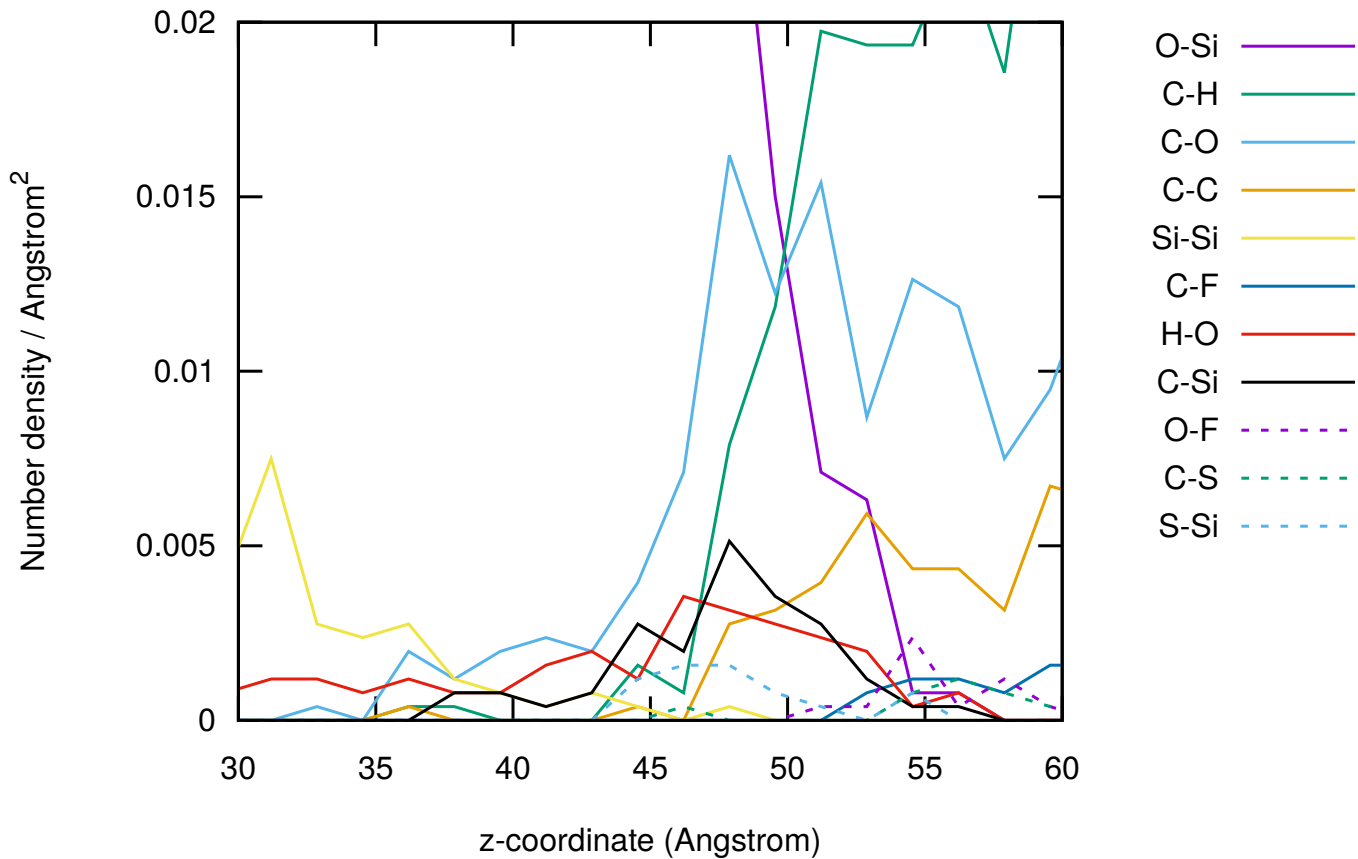

Supplement: s1 [file s1]

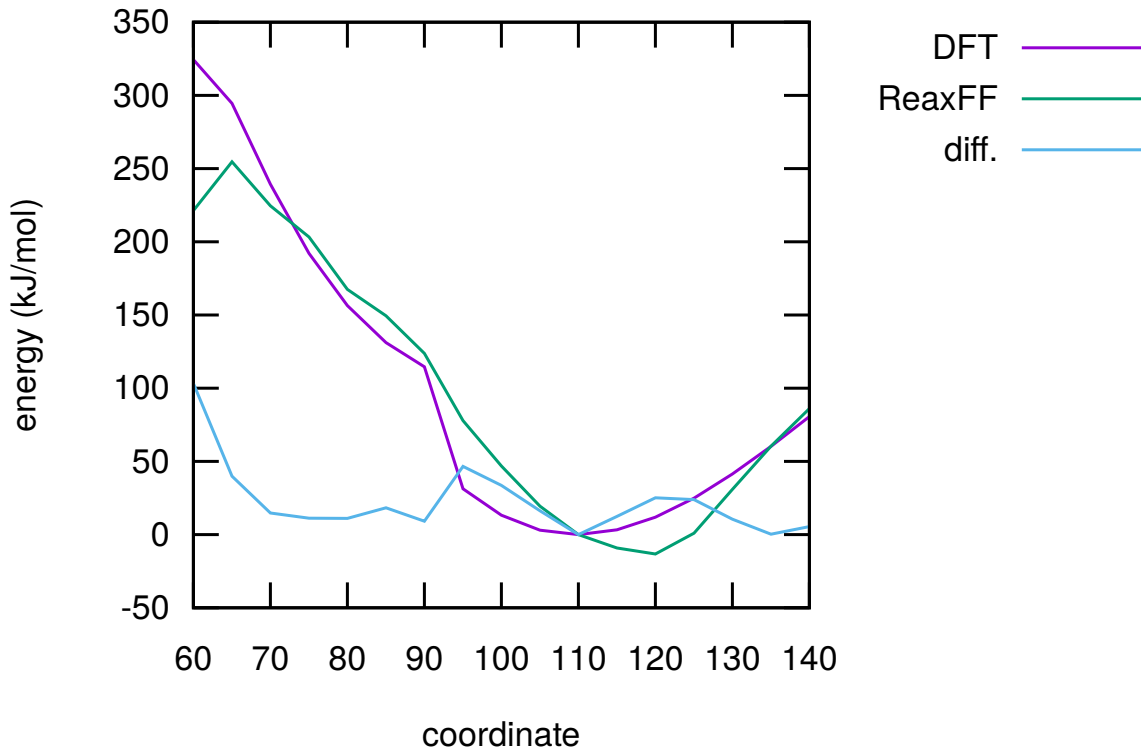

Supplement: s1 [file s1]

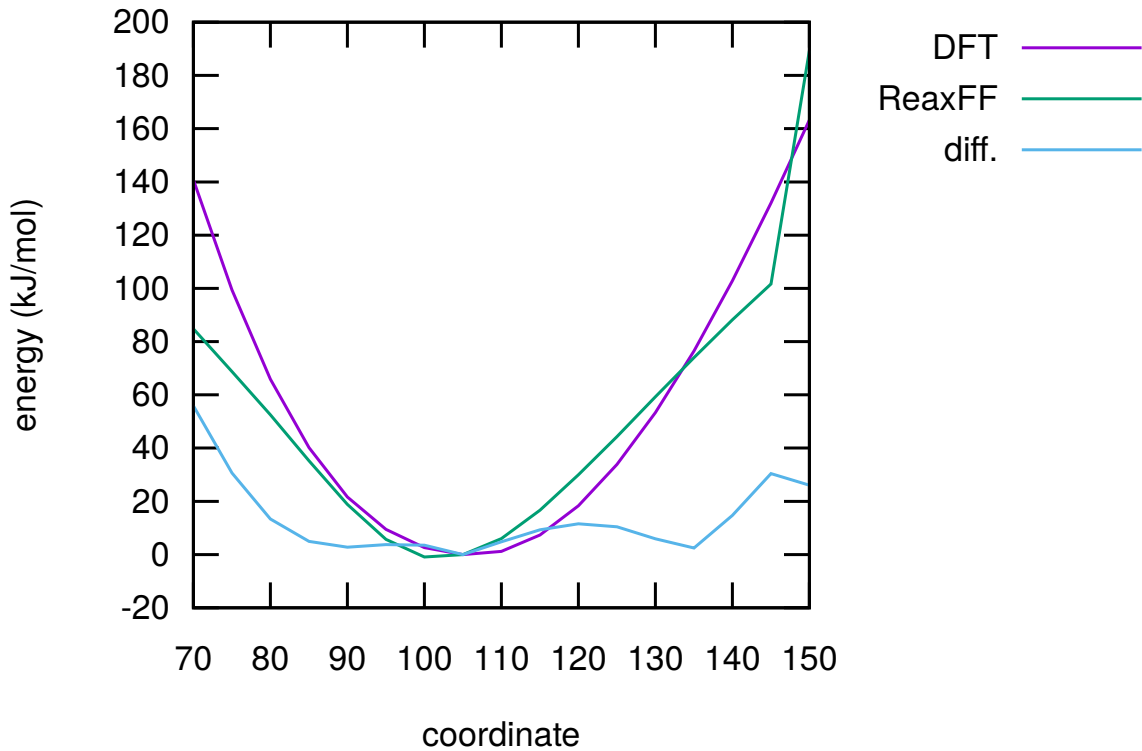

Supplement: s1 [file s1]

Number density / Angstrom<sup>2</sup>

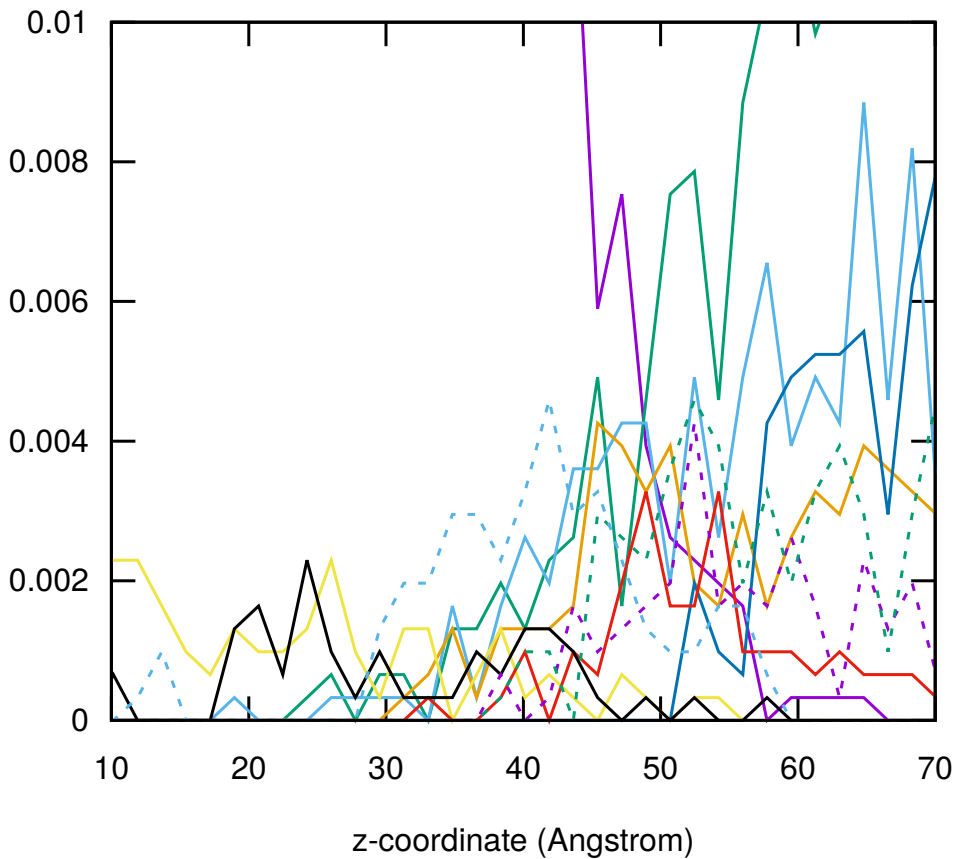

Supplement: s1 [file s1]

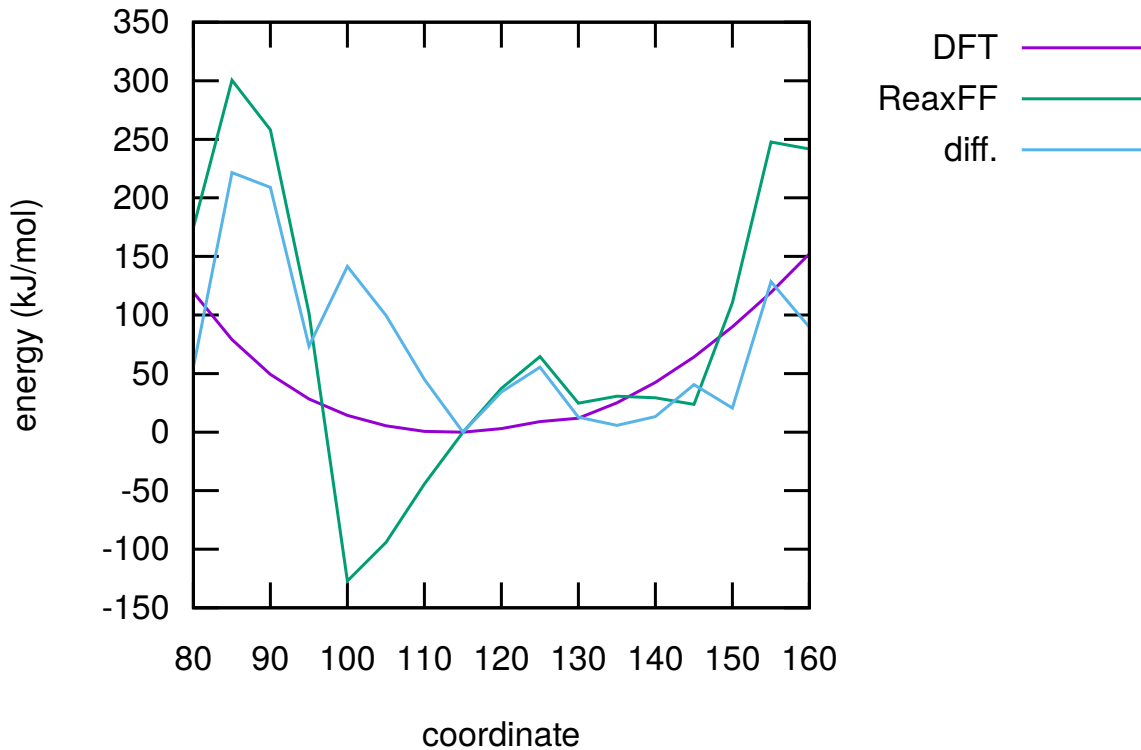

Supplement: s1 [file s1]

Number density / Angstrom

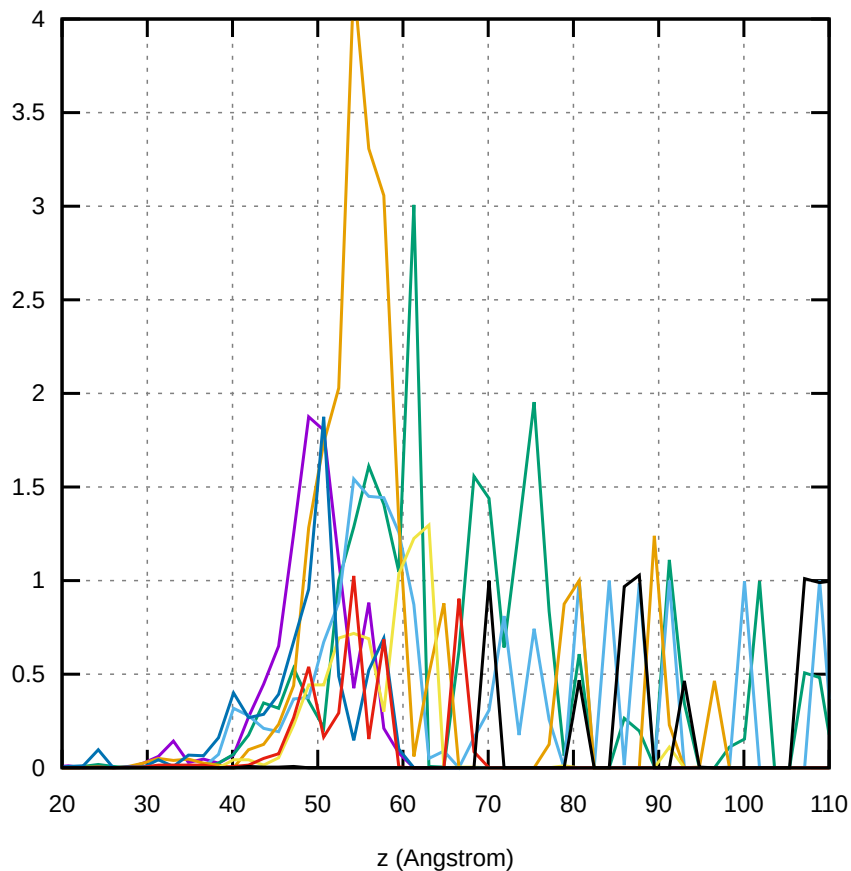

Supplement: s1 [file s1]

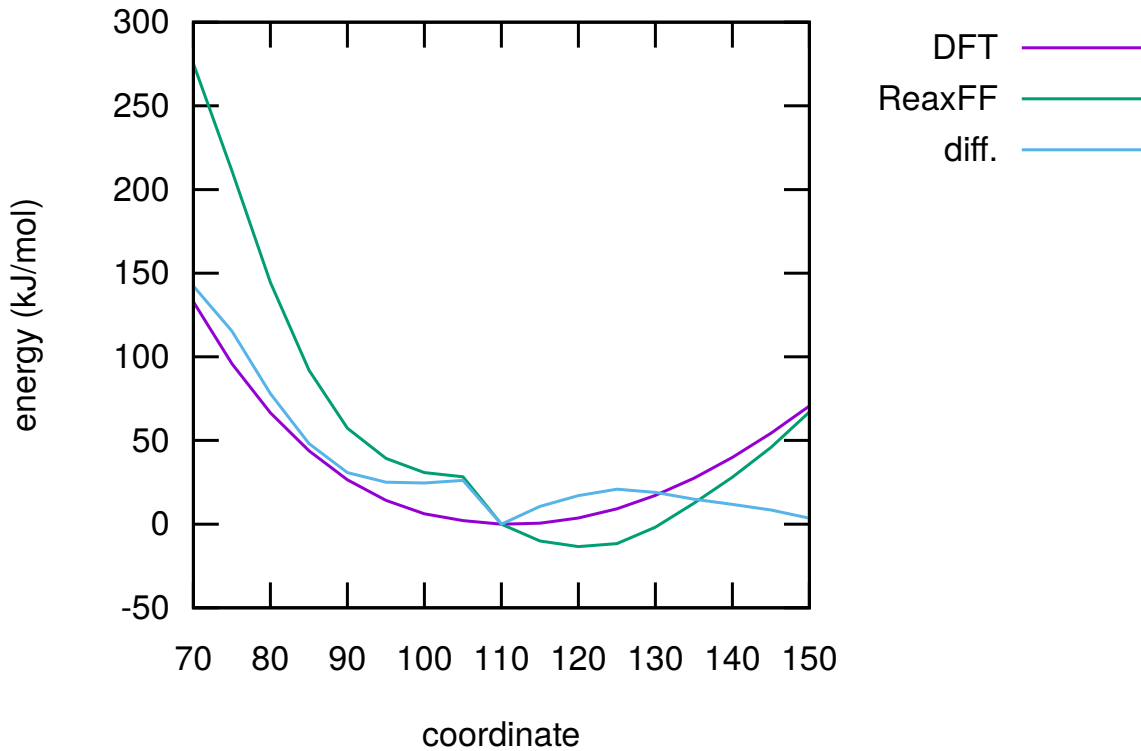

Supplement: s1 [file s1]

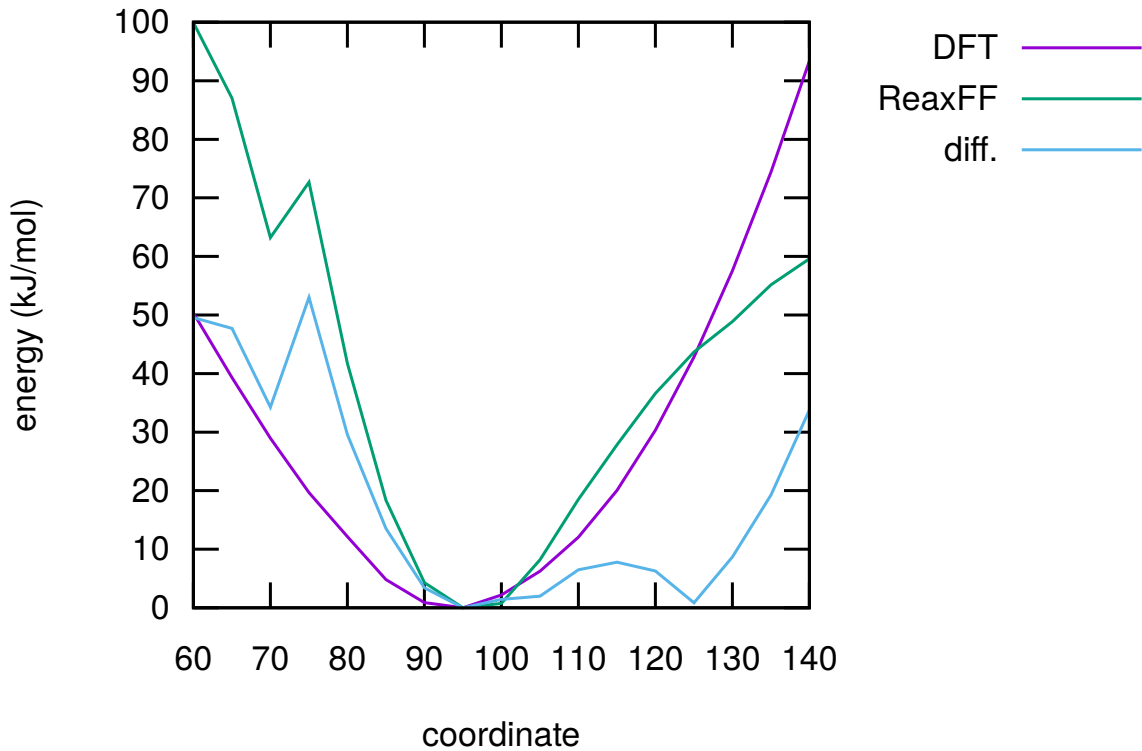

Supplement: s1 [file s1]

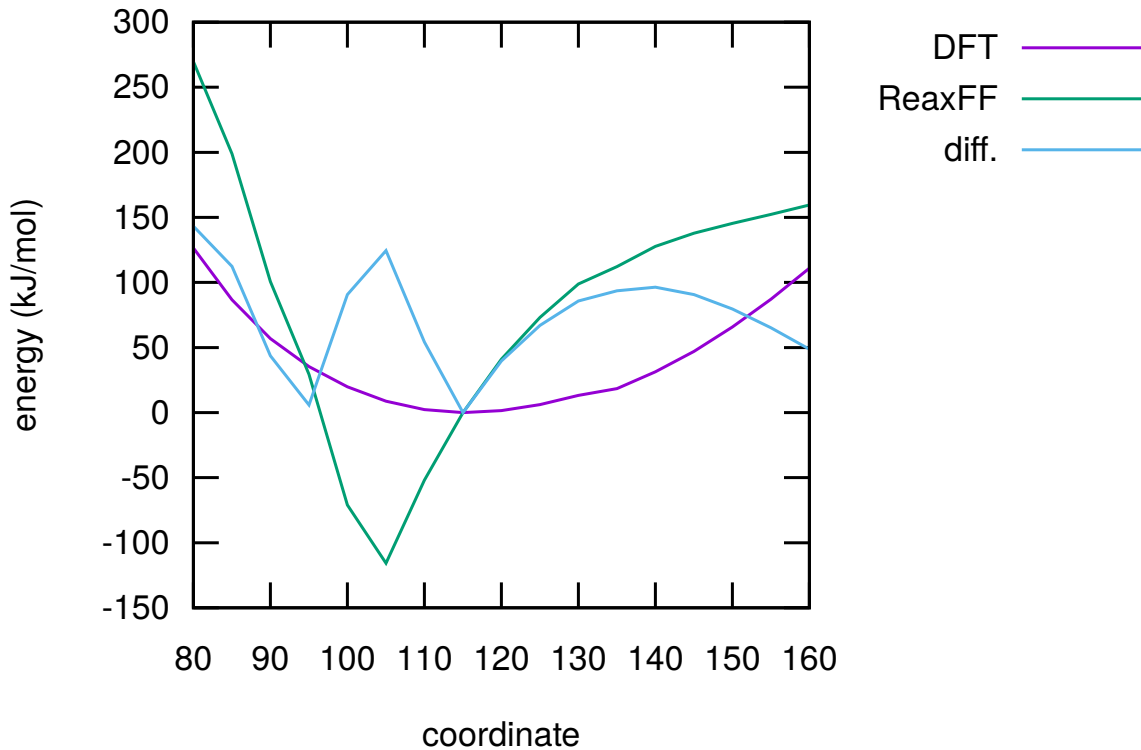

Supplement: s1 [file s1]

Number density / Angstrom<sup>2</sup>

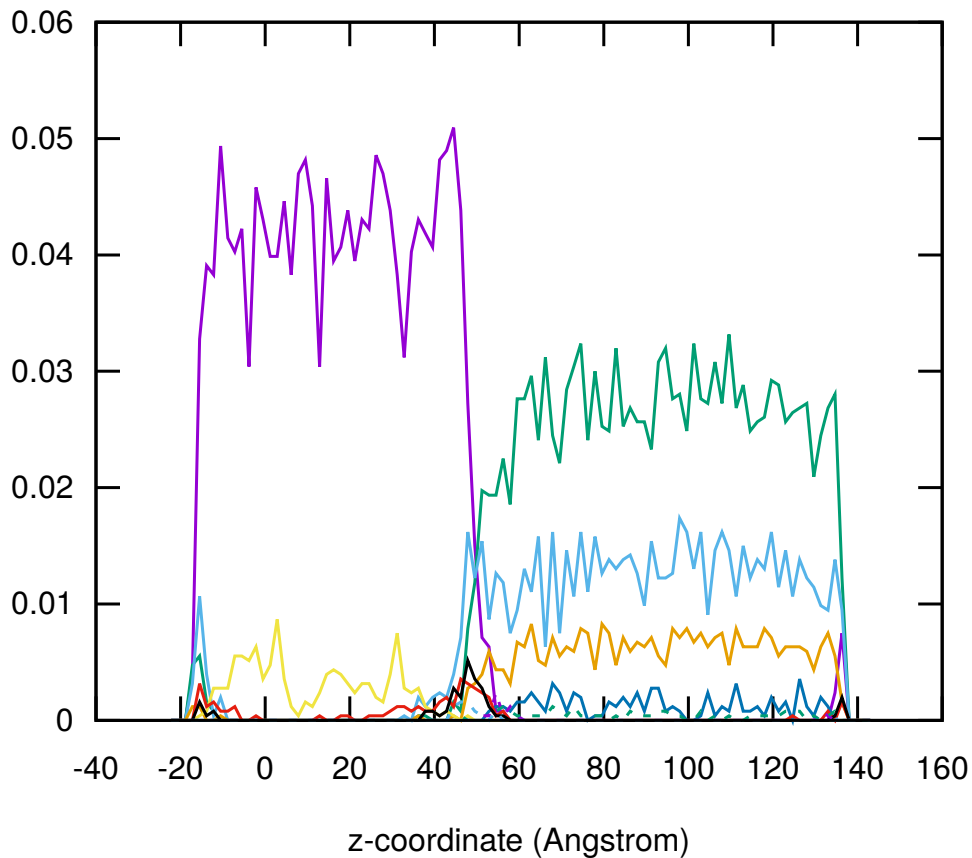

Supplement: s1 [file s1]

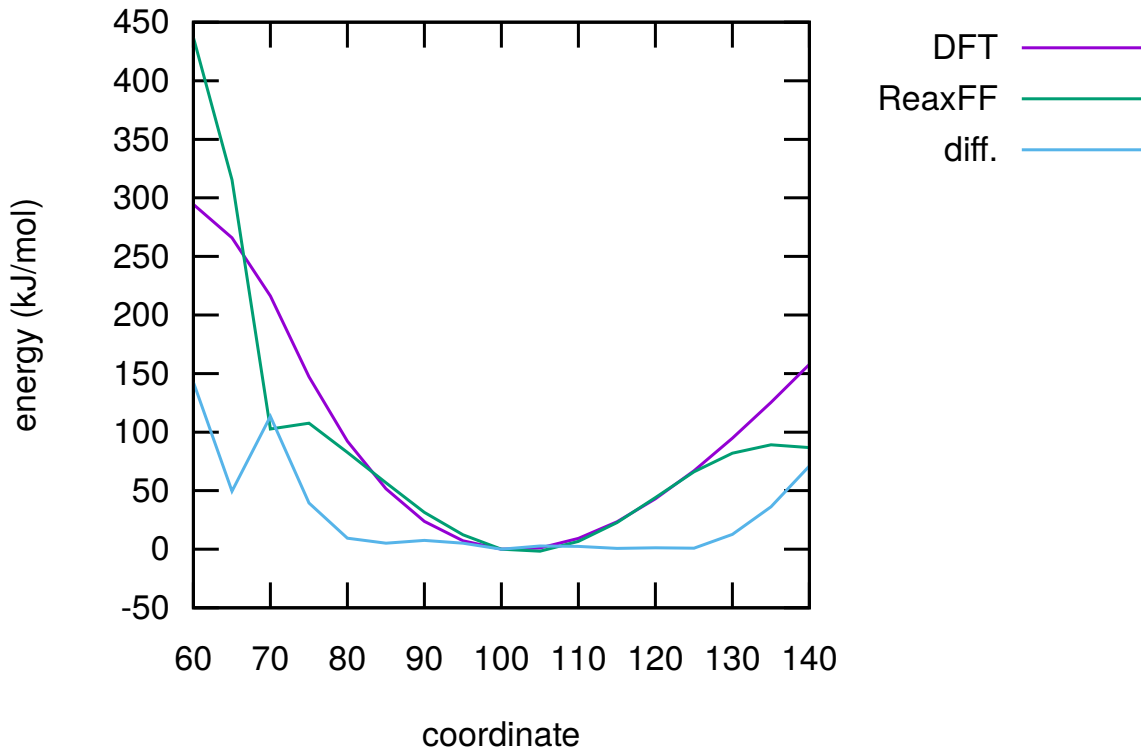

Supplement: s1 [file s1]

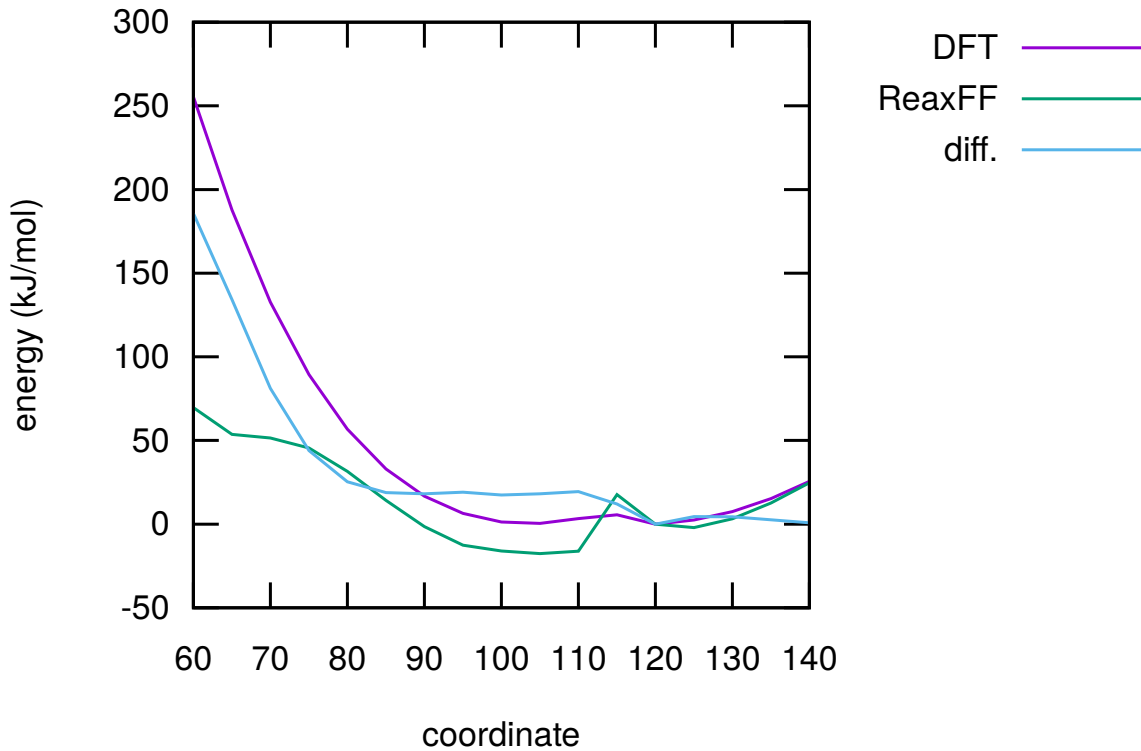

Supplement: s1 [file s1]

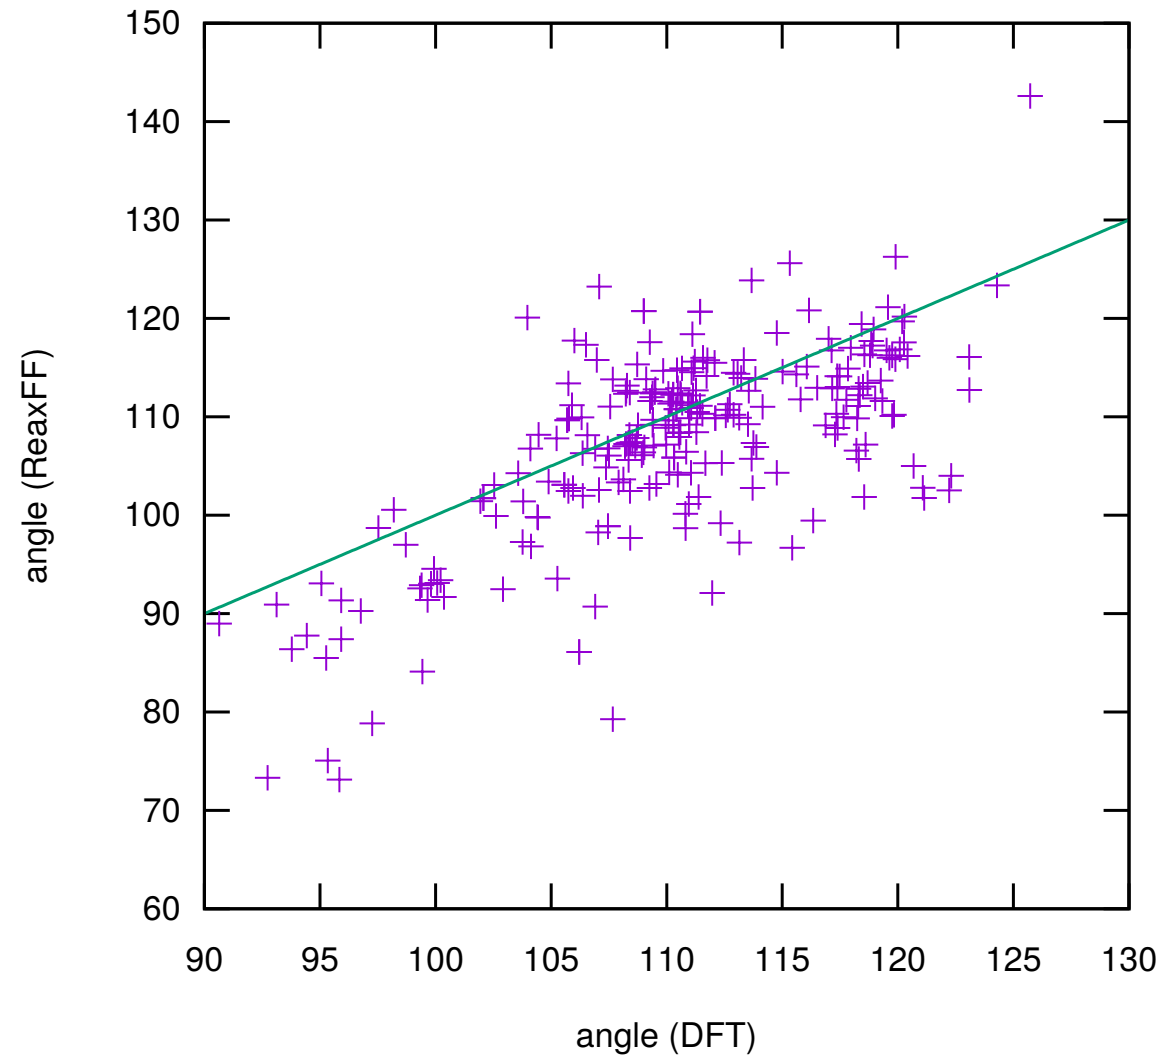

Supplement: s1 [file s1]

Number density / Angstrom

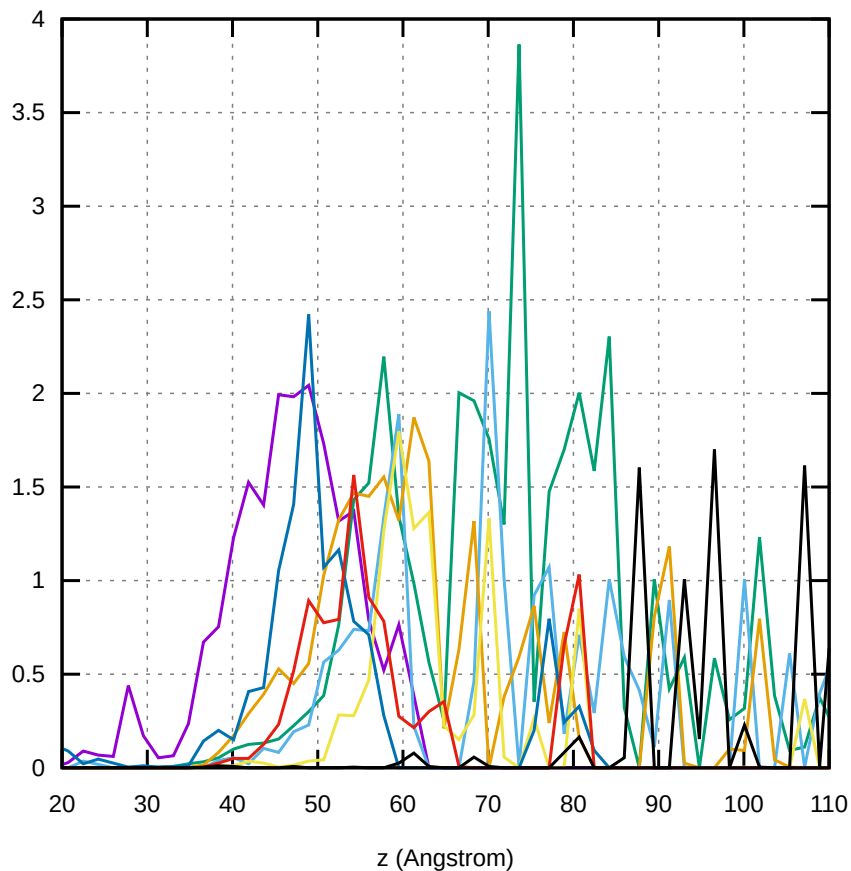

Supplement: s1 [file s1]

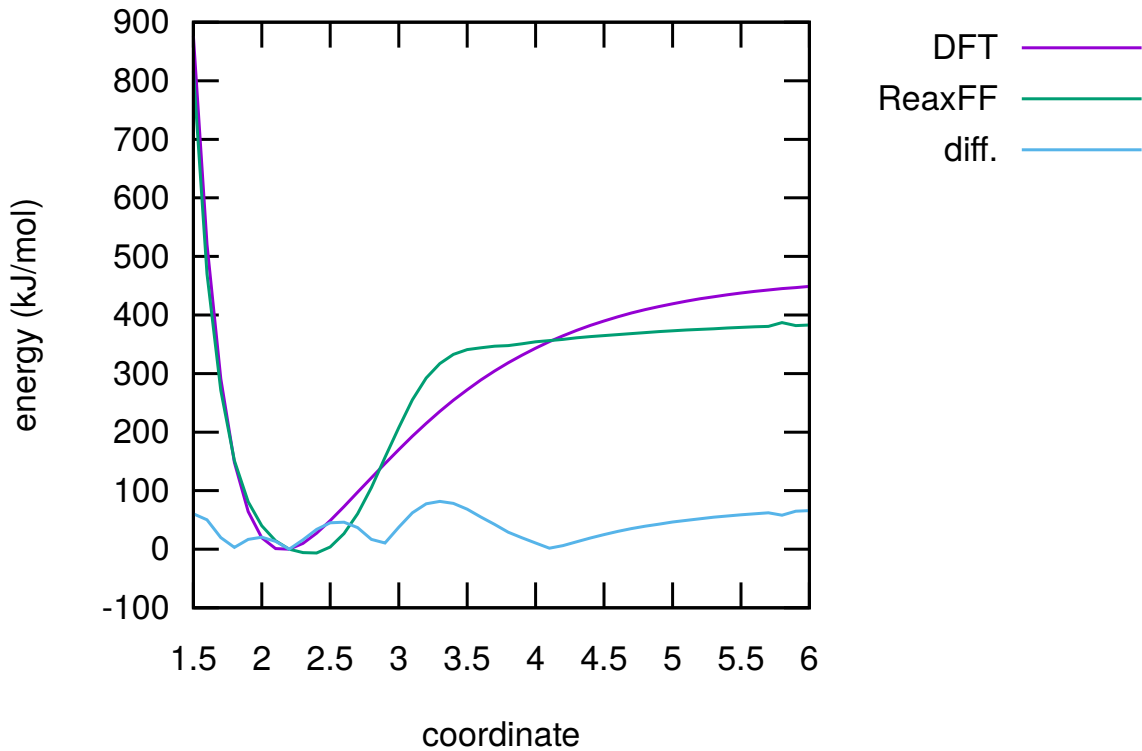

Supplement: s1 [file s1]

Number density / Angstrom<sup>2</sup>

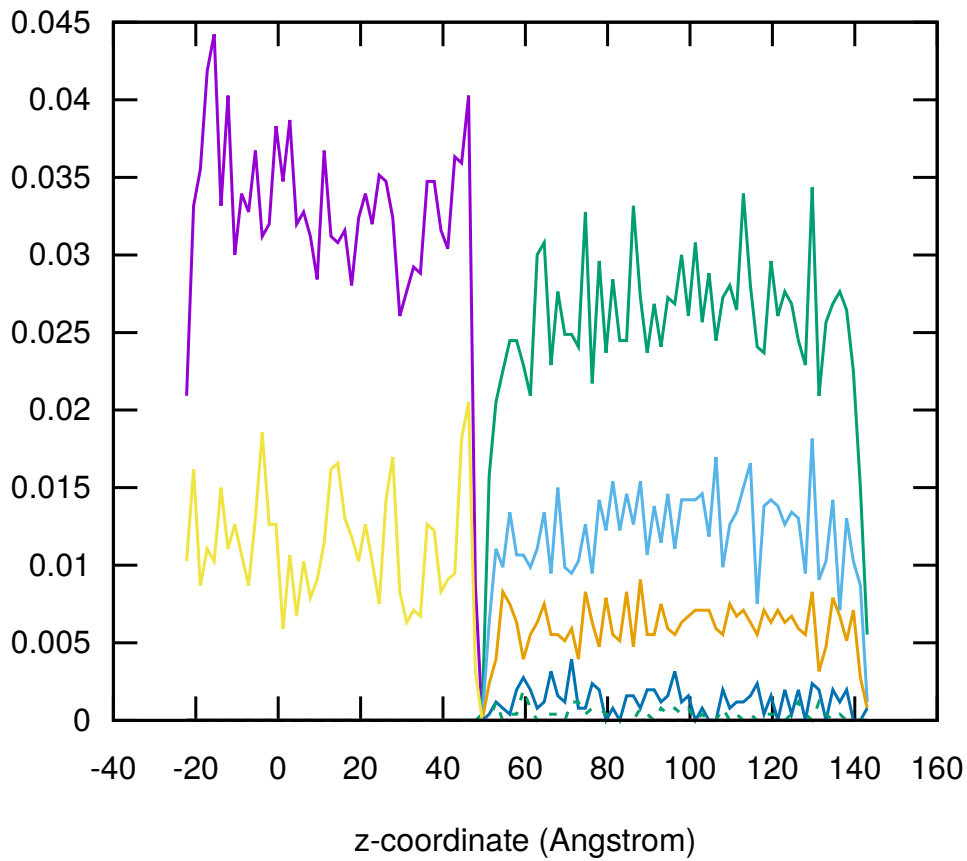

- O-Si
- C-H
- C-O
- C-C
- Si-Si
- C-F
- H-O
- C-Si
- O-F
- C-S
- S-Si

Supplement: s1 [file s1]

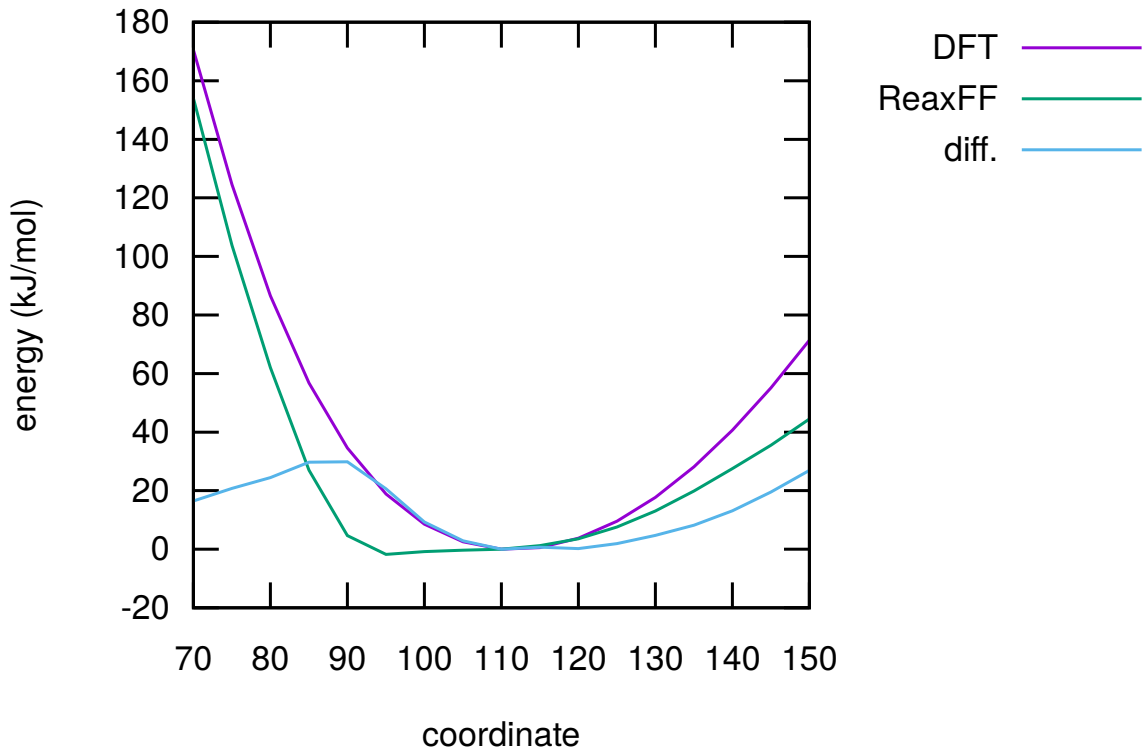

Supplement: s1 [file s1]

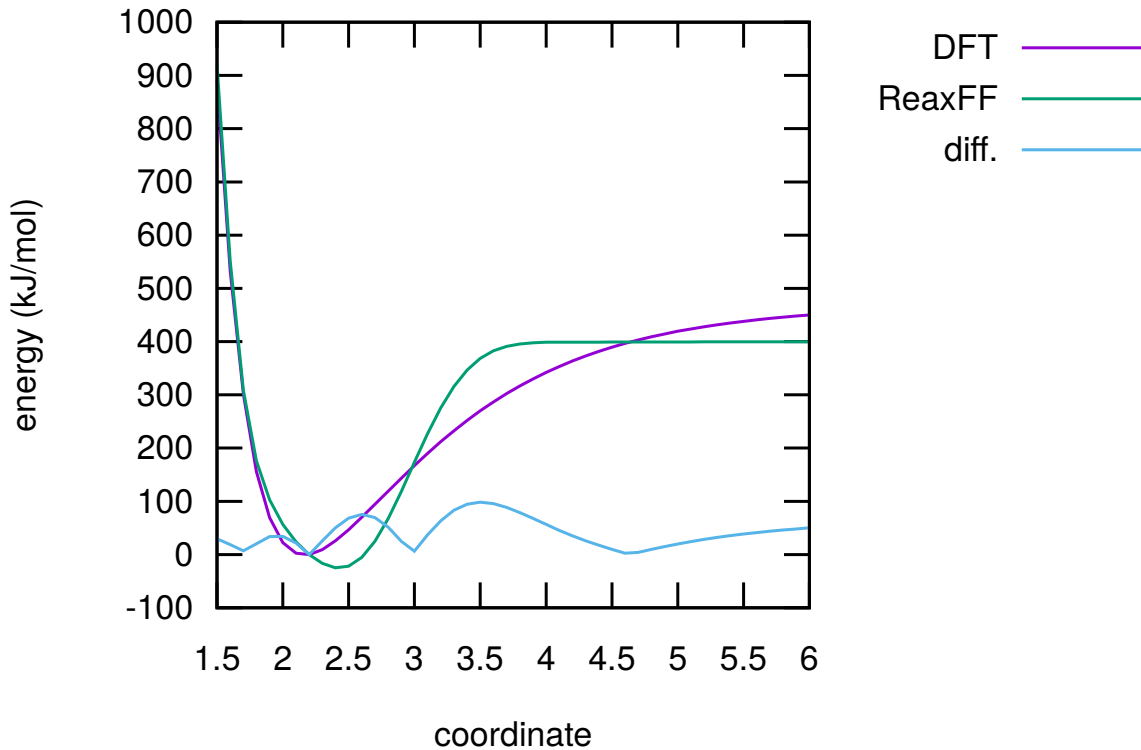

Supplement: s1 [file s1]

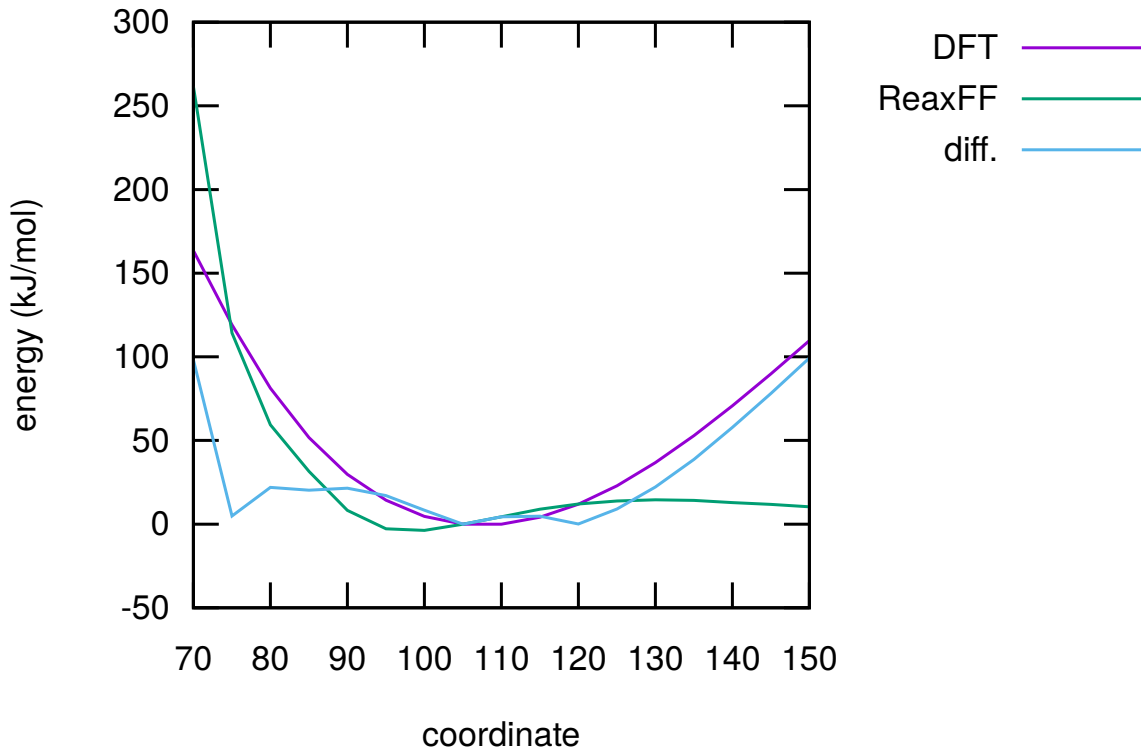

Supplement: s1 [file s1]

Number density / Angstrom<sup>2</sup>

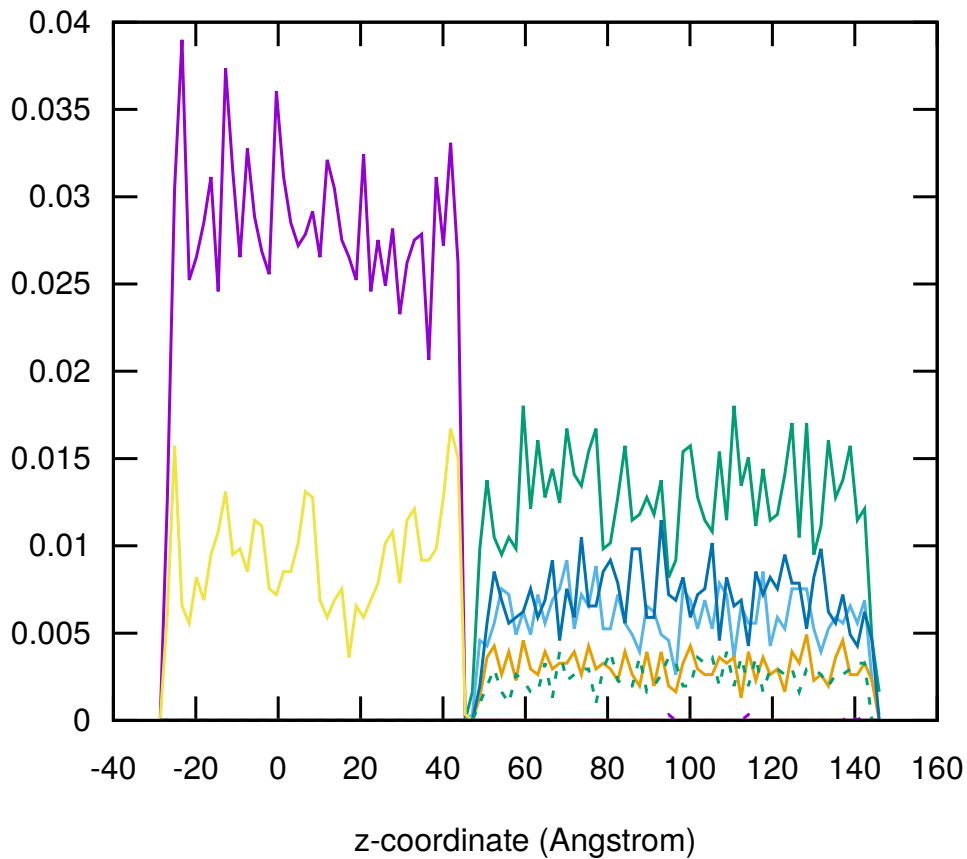

Supplement: s1 [file s1]

dihedral angle (ReaxFF)

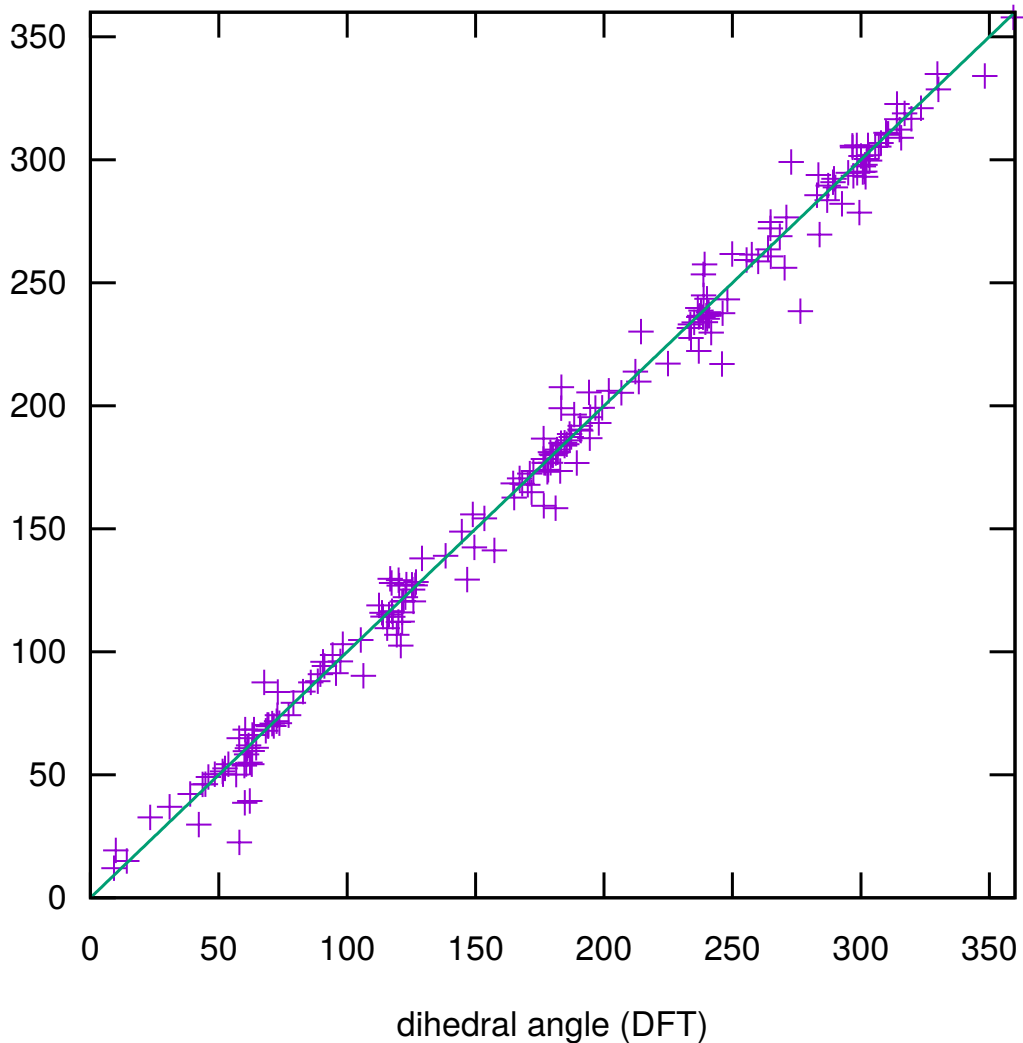

Supplement: s1 [file s1]

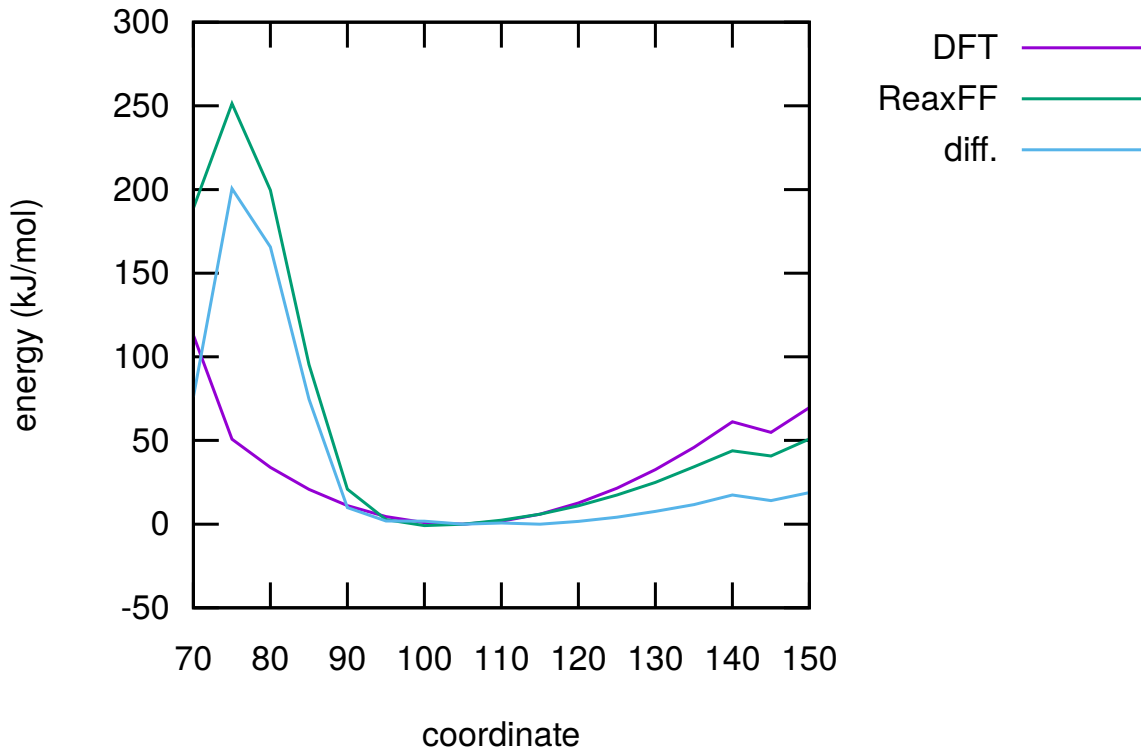

Supplement: s1 [file s1]
